# Supplementary material for: A scalable online tool for quantitative social network assessment reveals potentially modifiable social environmental risks
Source: PubMed Central journal article supplement (PMC6158181; doi:10.1038/s41467-018-06408-6), 2018-09-26
Supplement: 41467_2018_6408_MOESM1_ESM.pdf [file 41467_2018_6408_MOESM1_ESM.pdf]

# A Scalable Online Tool for Quantitative Social Network Assessment Reveals Potentially Modifiable Social Environmental Risks

Dhand et al.

## Supplementary Methods 1: Social Network Questionnaire

# GEMS Social Network Survey

Welcome to the GEMS Social Network Survey!

This survey is about your social network and its potential health effects.

Please carefully follow the instructions, particularly in the beginning of this survey as it impacts all future questions.

We estimate that the survey will take about 10-20 minutes.

To ensure confidentiality, individual names, nicknames, and initials listed by the participant will not be used in publications and will not be shared publicly.

---

---

## Please tell us a little bit about yourself first.

Date of birth

\_\_\_\_\_  
(YYYY-MM-DD)

Age

\_\_\_\_\_  
(Please do not proceed with this survey if you are younger than 18 years old. This study can only enroll participants 18 years and older.)

Gender

- Female  
 Male

What is your current address?

\_\_\_\_\_  
(e.g. 123 Main Street Boston MA)

What is your zip code?

\_\_\_\_\_

What is your employment status?

- Employed for wages
- Self-employed
- Out of work and looking for work
- Out of work but not currently looking for work
- A homemaker
- A student
- Military
- Retired
- Unable to work
- Prefer not to answer

Education level

- 1-8 years
- Some high school
- High school grad
- Some college
- Associate degree
- Bachelor's degree
- Graduate degree
- Prefer not to answer

Marital status

- Not married
- Married

Do you live alone?

- Yes
- No

Have you been diagnosed with Multiple Sclerosis?

- Yes
- No

How old were you when you first noticed neurological symptoms related to Multiple Sclerosis?

\_\_\_\_\_  
(Symptoms may be difficulty with seeing, speaking, using arms or legs, walking, numbness or tingling. Please only refer to symptoms that lasted at least 24 hours.)

How old were you when you were diagnosed?

\_\_\_\_\_

---



---

## Your Functional Status

**Below is a scale that attempts to rate the severity of MS symptoms, please rate your current functioning:**

|                                               | 0 No symptoms:<br>"I have no symptoms or disability in this specific area" | 1 Some symptoms, no disability: "I am aware of symptoms but no limits on my activities" | 2 Mild disability: "I have mild limits on my activities, but I do not need help from others or to use other aides" | 3 Moderate disability: "I have moderate limits on my activities and I sometimes need help from others or use other aides" | 4 Severe disability: "I have severe limits on my activities and I usually need help from others or use other aides" |
|-----------------------------------------------|----------------------------------------------------------------------------|-----------------------------------------------------------------------------------------|--------------------------------------------------------------------------------------------------------------------|---------------------------------------------------------------------------------------------------------------------------|---------------------------------------------------------------------------------------------------------------------|
| Walking                                       | <input type="radio"/>                                                      | <input type="radio"/>                                                                   | <input type="radio"/>                                                                                              | <input type="radio"/>                                                                                                     | <input type="radio"/>                                                                                               |
| Using your arms and hands                     | <input type="radio"/>                                                      | <input type="radio"/>                                                                   | <input type="radio"/>                                                                                              | <input type="radio"/>                                                                                                     | <input type="radio"/>                                                                                               |
| Vision                                        | <input type="radio"/>                                                      | <input type="radio"/>                                                                   | <input type="radio"/>                                                                                              | <input type="radio"/>                                                                                                     | <input type="radio"/>                                                                                               |
| Speech                                        | <input type="radio"/>                                                      | <input type="radio"/>                                                                   | <input type="radio"/>                                                                                              | <input type="radio"/>                                                                                                     | <input type="radio"/>                                                                                               |
| Swallowing                                    | <input type="radio"/>                                                      | <input type="radio"/>                                                                   | <input type="radio"/>                                                                                              | <input type="radio"/>                                                                                                     | <input type="radio"/>                                                                                               |
| Thinking, memory or cognition                 | <input type="radio"/>                                                      | <input type="radio"/>                                                                   | <input type="radio"/>                                                                                              | <input type="radio"/>                                                                                                     | <input type="radio"/>                                                                                               |
| Numbness, tingling, burning sensation or pain | <input type="radio"/>                                                      | <input type="radio"/>                                                                   | <input type="radio"/>                                                                                              | <input type="radio"/>                                                                                                     | <input type="radio"/>                                                                                               |
| Controlling your bladder and/or bowel         | <input type="radio"/>                                                      | <input type="radio"/>                                                                   | <input type="radio"/>                                                                                              | <input type="radio"/>                                                                                                     | <input type="radio"/>                                                                                               |

---



---

**We are now going to ask you to name people in your life. Please only use first names, nicknames, or initials of adults (older than 18). If two people have the same first name, then add a last initial. Please list up to 5 names in the boxes, and more names in the big box after. Don't worry about duplicates OR blanks. We will deal with them later.**

**From time to time, most people discuss important personal matters with other people. Looking back over the last 3 months, who are the adults with whom you discussed an important personal matter? Please list the names of these adults.**

Name 1 \_\_\_\_\_

Name 2 \_\_\_\_\_

Name 3 \_\_\_\_\_

Name 4 \_\_\_\_\_

Name 5 \_\_\_\_\_

More names, separated by commas (if needed):

\_\_\_\_\_

---

---

**From time to time, people socialize with other people. For instance, they visit each other, go together on a trip or to a dinner. In the last 3 months, who are the adults with whom you usually do these things? Please list their first names. Don't worry about duplicates OR blanks.**

Name 1 \_\_\_\_\_

Name 2 \_\_\_\_\_

Name 3 \_\_\_\_\_

Name 4 \_\_\_\_\_

Name 5 \_\_\_\_\_

More names, separated by commas (if needed):  
\_\_\_\_\_

---

---

**Think about people who support you to stay healthy. In the last 3 months, who provides support for your health needs? Please list their first names. Don't worry about duplicates OR blanks.**

Name 1 \_\_\_\_\_

Name 2 \_\_\_\_\_

Name 3 \_\_\_\_\_

Name 4 \_\_\_\_\_

Name 5 \_\_\_\_\_

More names, separated by commas (if needed):  
\_\_\_\_\_



- [name1]  especially close  
 not especially close
- [name2]  especially close  
 not especially close
- [name3]  especially close  
 not especially close
- [name4]  especially close  
 not especially close
- [name5]  especially close  
 not especially close
- [name6]  especially close  
 not especially close
- [name7]  especially close  
 not especially close
- [name8]  especially close  
 not especially close
- [name9]  especially close  
 not especially close
- [name10]  especially close  
 not especially close
- [name11]  especially close  
 not especially close
- [name12]  especially close  
 not especially close
- [name13]  especially close  
 not especially close
- [name14]  especially close  
 not especially close
- [name15]  especially close  
 not especially close

---

**We will now focus on the relationship between each pair of people you mentioned. For example, we will ask about [name1] and [name2]. For each pair, we will ask whether they are total strangers, in-between, or especially close. Here is what we mean by each term:**

**Total strangers: The two people wouldn't recognize one another if they met on the street.**

**In-between: Relationships in the middle of total strangers and especially close. Typically, these people are casual acquaintances.**

**Especially close: As close or closer to each other than they are to you.**

**Take your time. This can be difficult.**



Is [name1] a total stranger, especially close, or in-between with [name2]?

- stranger
- in-between
- especially close

Is [name1] a total stranger, especially close, or in-between with [name3]?

- stranger
- in-between
- especially close

Is [name1] a total stranger, especially close, or in-between with [name4]?

- stranger
- in-between
- especially close

Is [name1] a total stranger, especially close, or in-between with [name5]?

- stranger
- in-between
- especially close

Is [name1] a total stranger, especially close, or in-between with [name6]?

- stranger
- in-between
- especially close

Is [name1] a total stranger, especially close, or in-between with [name7]?

- stranger
- in-between
- especially close

Is [name1] a total stranger, especially close, or in-between with [name8]?

- stranger
- in-between
- especially close

Is [name1] a total stranger, especially close, or in-between with [name9]?

- stranger
- in-between
- especially close

Is [name1] a total stranger, especially close, or in-between with [name10]?

- stranger
- in-between
- especially close

Is [name1] a total stranger, especially close, or in-between with [name11]?

- stranger
- in-between
- especially close

Is [name1] a total stranger, especially close, or in-between with [name12]?

- stranger
- in-between
- especially close

Is [name1] a total stranger, especially close, or in-between with [name13]?

- stranger
- in-between
- especially close

Is [name1] a total stranger, especially close, or in-between with [name14]?

- stranger
- in-between
- especially close

Is [name1] a total stranger, especially close, or in-between with [name15]?

- stranger
- in-between
- especially close

Is [name2] a total stranger, especially close, or in-between with [name3]?

- stranger
- in-between
- especially close

Is [name2] a total stranger, especially close, or in-between with [name4]?

- stranger
- in-between
- especially close

Is [name2] a total stranger, especially close, or in-between with [name5]?

- stranger  
 in-between  
 especially close

Is [name2] a total stranger, especially close, or in-between with [name6]?

- stranger  
 in-between  
 especially close

Is [name2] a total stranger, especially close, or in-between with [name7]?

- stranger  
 in-between  
 especially close

Is [name2] a total stranger, especially close, or in-between with [name8]?

- stranger  
 in-between  
 especially close

Is [name2] a total stranger, especially close, or in-between with [name9]?

- stranger  
 in-between  
 especially close

Is [name2] a total stranger, especially close, or in-between with [name10]?

- stranger  
 in-between  
 especially close

Is [name2] a total stranger, especially close, or in-between with [name11]?

- stranger  
 in-between  
 especially close

Is [name2] a total stranger, especially close, or in-between with [name12]?

- stranger  
 in-between  
 especially close

Is [name2] a total stranger, especially close, or in-between with [name13]?

- stranger  
 in-between  
 especially close

Is [name2] a total stranger, especially close, or in-between with [name14]?

- stranger  
 in-between  
 especially close

Is [name2] a total stranger, especially close, or in-between with [name15]?

- stranger  
 in-between  
 especially close

Is [name3] a total stranger, especially close, or in-between with [name4]?

- stranger  
 in-between  
 especially close

Is [name3] a total stranger, especially close, or in-between with [name5]?

- stranger  
 in-between  
 especially close

Is [name3] a total stranger, especially close, or in-between with [name6]?

- stranger  
 in-between  
 especially close

Is [name3] a total stranger, especially close, or in-between with [name7]?

- stranger  
 in-between  
 especially close

Is [name3] a total stranger, especially close, or in-between with [name8]?

- stranger  
 in-between  
 especially close

Is [name3] a total stranger, especially close, or in-between with [name9]?

- stranger  
 in-between  
 especially close

Is [name3] a total stranger, especially close, or in-between with [name10]?

- stranger  
 in-between  
 especially close

Is [name3] a total stranger, especially close, or in-between with [name11]?

- stranger  
 in-between  
 especially close

Is [name3] a total stranger, especially close, or in-between with [name12]?

- stranger  
 in-between  
 especially close

Is [name3] a total stranger, especially close, or in-between with [name13]?

- stranger  
 in-between  
 especially close

Is [name3] a total stranger, especially close, or in-between with [name14]?

- stranger  
 in-between  
 especially close

Is [name3] a total stranger, especially close, or in-between with [name15]?

- stranger  
 in-between  
 especially close

Is [name4] a total stranger, especially close, or in-between with [name5]?

- stranger  
 in-between  
 especially close

Is [name4] a total stranger, especially close, or in-between with [name6]?

- stranger  
 in-between  
 especially close

Is [name4] a total stranger, especially close, or in-between with [name7]?

- stranger  
 in-between  
 especially close

Is [name4] a total stranger, especially close, or in-between with [name8]?

- stranger  
 in-between  
 especially close

Is [name4] a total stranger, especially close, or in-between with [name9]?

- stranger  
 in-between  
 especially close

Is [name4] a total stranger, especially close, or in-between with [name10]?

- stranger  
 in-between  
 especially close

Is [name4] a total stranger, especially close, or in-between with [name11]?

- stranger  
 in-between  
 especially close

Is [name4] a total stranger, especially close, or in-between with [name12]?

- stranger  
 in-between  
 especially close

Is [name4] a total stranger, especially close, or in-between with [name13]?

- stranger  
 in-between  
 especially close

Is [name4] a total stranger, especially close, or in-between with [name14]?

- stranger
- in-between
- especially close

Is [name4] a total stranger, especially close, or in-between with [name15]?

- stranger
- in-between
- especially close

Is [name5] a total stranger, especially close, or in-between with [name6]?

- stranger
- in-between
- especially close

Is [name5] a total stranger, especially close, or in-between with [name7]?

- stranger
- in-between
- especially close

Is [name5] a total stranger, especially close, or in-between with [name8]?

- stranger
- in-between
- especially close

Is [name5] a total stranger, especially close, or in-between with [name9]?

- stranger
- in-between
- especially close

Is [name5] a total stranger, especially close, or in-between with [name10]?

- stranger
- in-between
- especially close

Is [name5] a total stranger, especially close, or in-between with [name11]?

- stranger
- in-between
- especially close

Is [name5] a total stranger, especially close, or in-between with [name12]?

- stranger
- in-between
- especially close

Is [name5] a total stranger, especially close, or in-between with [name13]?

- stranger
- in-between
- especially close

Is [name5] a total stranger, especially close, or in-between with [name14]?

- stranger
- in-between
- especially close

Is [name5] a total stranger, especially close, or in-between with [name15]?

- stranger
- in-between
- especially close

Is [name6] a total stranger, especially close, or in-between with [name7]?

- stranger
- in-between
- especially close

Is [name6] a total stranger, especially close, or in-between with [name8]?

- stranger
- in-between
- especially close

Is [name6] a total stranger, especially close, or in-between with [name9]?

- stranger
- in-between
- especially close

Is [name6] a total stranger, especially close, or in-between with [name10]?

- stranger
- in-between
- especially close

Is [name6] a total stranger, especially close, or in-between with [name11]?

- stranger  
 in-between  
 especially close

Is [name6] a total stranger, especially close, or in-between with [name12]?

- stranger  
 in-between  
 especially close

Is [name6] a total stranger, especially close, or in-between with [name13]?

- stranger  
 in-between  
 especially close

Is [name6] a total stranger, especially close, or in-between with [name14]?

- stranger  
 in-between  
 especially close

Is [name6] a total stranger, especially close, or in-between with [name15]?

- stranger  
 in-between  
 especially close

Is [name7] a total stranger, especially close, or in-between with [name8]?

- stranger  
 in-between  
 especially close

Is [name7] a total stranger, especially close, or in-between with [name9]?

- stranger  
 in-between  
 especially close

Is [name7] a total stranger, especially close, or in-between with [name10]?

- stranger  
 in-between  
 especially close

Is [name7] a total stranger, especially close, or in-between with [name11]?

- stranger  
 in-between  
 especially close

Is [name7] a total stranger, especially close, or in-between with [name12]?

- stranger  
 in-between  
 especially close

Is [name7] a total stranger, especially close, or in-between with [name13]?

- stranger  
 in-between  
 especially close

Is [name7] a total stranger, especially close, or in-between with [name14]?

- stranger  
 in-between  
 especially close

Is [name7] a total stranger, especially close, or in-between with [name15]?

- stranger  
 in-between  
 especially close

Is [name8] a total stranger, especially close, or in-between with [name9]?

- stranger  
 in-between  
 especially close

Is [name8] a total stranger, especially close, or in-between with [name10]?

- stranger  
 in-between  
 especially close

Is [name8] a total stranger, especially close, or in-between with [name11]?

- stranger  
 in-between  
 especially close

Is [name8] a total stranger, especially close, or in-between with [name12]?

- stranger  
 in-between  
 especially close

Is [name8] a total stranger, especially close, or in-between with [name13]?

- stranger  
 in-between  
 especially close

Is [name8] a total stranger, especially close, or in-between with [name14]?

- stranger  
 in-between  
 especially close

Is [name8] a total stranger, especially close, or in-between with [name15]?

- stranger  
 in-between  
 especially close

Is [name9] a total stranger, especially close, or in-between with [name10]?

- stranger  
 in-between  
 especially close

Is [name9] a total stranger, especially close, or in-between with [name11]?

- stranger  
 in-between  
 especially close

Is [name9] a total stranger, especially close, or in-between with [name12]?

- stranger  
 in-between  
 especially close

Is [name9] a total stranger, especially close, or in-between with [name13]?

- stranger  
 in-between  
 especially close

Is [name9] a total stranger, especially close, or in-between with [name14]?

- stranger  
 in-between  
 especially close

Is [name9] a total stranger, especially close, or in-between with [name15]?

- stranger  
 in-between  
 especially close

Is [name10] a total stranger, especially close, or in-between with [name11]?

- stranger  
 in-between  
 especially close

Is [name10] a total stranger, especially close, or in-between with [name12]?

- stranger  
 in-between  
 especially close

Is [name10] a total stranger, especially close, or in-between with [name13]?

- stranger  
 in-between  
 especially close

Is [name10] a total stranger, especially close, or in-between with [name14]?

- stranger  
 in-between  
 especially close

Is [name10] a total stranger, especially close, or in-between with [name15]?

- stranger  
 in-between  
 especially close

Is [name11] a total stranger, especially close, or in-between with [name12]?

- stranger  
 in-between  
 especially close

Is [name11] a total stranger, especially close, or in-between with [name13]?

- stranger
- in-between
- especially close

Is [name11] a total stranger, especially close, or in-between with [name14]?

- stranger
- in-between
- especially close

Is [name11] a total stranger, especially close, or in-between with [name15]?

- stranger
- in-between
- especially close

Is [name12] a total stranger, especially close, or in-between with [name13]?

- stranger
- in-between
- especially close

Is [name12] a total stranger, especially close, or in-between with [name14]?

- stranger
- in-between
- especially close

Is [name12] a total stranger, especially close, or in-between with [name15]?

- stranger
- in-between
- especially close

Is [name13] a total stranger, especially close, or in-between with [name14]?

- stranger
- in-between
- especially close

Is [name13] a total stranger, especially close, or in-between with [name15]?

- stranger
- in-between
- especially close

Is [name14] a total stranger, especially close, or in-between with [name15]?

- stranger
- in-between
- especially close

---

**We're now going to ask about how much support you have from people in general. If you needed it, how often is someone available to do the following for you?**

To help you if you were confined to bed?

- None of the time
- A little of the time
- Some of the time
- Most of the time
- All of the time

To take you to the doctor if you need it?

- None of the time
- A little of the time
- Some of the time
- Most of the time
- All of the time

To prepare your meals if you are unable to do it yourself?

- None of the time
- A little of the time
- Some of the time
- Most of the time
- All of the time

To help with daily chores if you were sick?

- None of the time
- A little of the time
- Some of the time
- Most of the time
- All of the time

To have a good time with?

- None of the time
- A little of the time
- Some of the time
- Most of the time
- All of the time

To turn for suggestions about how to deal with a personal problem?

- None of the time
- A little of the time
- Some of the time
- Most of the time
- All of the time

Who understands your problems?

- None of the time
- A little of the time
- Some of the time
- Most of the time
- All of the time

To love and make you feel wanted?

- None of the time
- A little of the time
- Some of the time
- Most of the time
- All of the time

---

**Out of the people listed below, which person or persons do these supportive actions most often? You can chose more than one person.**

|          | Supports me most often   |
|----------|--------------------------|
| [name1]  | <input type="checkbox"/> |
| [name2]  | <input type="checkbox"/> |
| [name3]  | <input type="checkbox"/> |
| [name4]  | <input type="checkbox"/> |
| [name5]  | <input type="checkbox"/> |
| [name6]  | <input type="checkbox"/> |
| [name7]  | <input type="checkbox"/> |
| [name8]  | <input type="checkbox"/> |
| [name9]  | <input type="checkbox"/> |
| [name10] | <input type="checkbox"/> |
| [name11] | <input type="checkbox"/> |
| [name12] | <input type="checkbox"/> |
| [name13] | <input type="checkbox"/> |
| [name14] | <input type="checkbox"/> |
| [name15] | <input type="checkbox"/> |



---



---

**What gender is each person in your social network?**

|          | Male                  | Female                | Other                 |
|----------|-----------------------|-----------------------|-----------------------|
| [name1]  | <input type="radio"/> | <input type="radio"/> | <input type="radio"/> |
| [name2]  | <input type="radio"/> | <input type="radio"/> | <input type="radio"/> |
| [name3]  | <input type="radio"/> | <input type="radio"/> | <input type="radio"/> |
| [name4]  | <input type="radio"/> | <input type="radio"/> | <input type="radio"/> |
| [name5]  | <input type="radio"/> | <input type="radio"/> | <input type="radio"/> |
| [name6]  | <input type="radio"/> | <input type="radio"/> | <input type="radio"/> |
| [name7]  | <input type="radio"/> | <input type="radio"/> | <input type="radio"/> |
| [name8]  | <input type="radio"/> | <input type="radio"/> | <input type="radio"/> |
| [name9]  | <input type="radio"/> | <input type="radio"/> | <input type="radio"/> |
| [name10] | <input type="radio"/> | <input type="radio"/> | <input type="radio"/> |
| [name11] | <input type="radio"/> | <input type="radio"/> | <input type="radio"/> |
| [name12] | <input type="radio"/> | <input type="radio"/> | <input type="radio"/> |
| [name13] | <input type="radio"/> | <input type="radio"/> | <input type="radio"/> |
| [name14] | <input type="radio"/> | <input type="radio"/> | <input type="radio"/> |
| [name15] | <input type="radio"/> | <input type="radio"/> | <input type="radio"/> |

---



---

**Do any people have a negative influence on your health? For example, does a person passively or actively encourage you to smoke, not eat well, or not exercise?**

|          |                                                       |
|----------|-------------------------------------------------------|
| [name1]  | <input type="radio"/> Yes<br><input type="radio"/> No |
| [name2]  | <input type="radio"/> Yes<br><input type="radio"/> No |
| [name3]  | <input type="radio"/> Yes<br><input type="radio"/> No |
| [name4]  | <input type="radio"/> Yes<br><input type="radio"/> No |
| [name5]  | <input type="radio"/> Yes<br><input type="radio"/> No |
| [name6]  | <input type="radio"/> Yes<br><input type="radio"/> No |
| [name7]  | <input type="radio"/> Yes<br><input type="radio"/> No |
| [name8]  | <input type="radio"/> Yes<br><input type="radio"/> No |
| [name9]  | <input type="radio"/> Yes<br><input type="radio"/> No |
| [name10] | <input type="radio"/> Yes<br><input type="radio"/> No |

- [name11]  Yes  
 No
- [name12]  Yes  
 No
- [name13]  Yes  
 No
- [name14]  Yes  
 No
- [name15]  Yes  
 No

---

---

**What is the race of each person in your social network?**

|          | White                 | Black                 | Asian                 | American Indian       | Native Hawaiian       | Other                 | Don't know            |
|----------|-----------------------|-----------------------|-----------------------|-----------------------|-----------------------|-----------------------|-----------------------|
| [name1]  | <input type="radio"/> | <input type="radio"/> | <input type="radio"/> | <input type="radio"/> | <input type="radio"/> | <input type="radio"/> | <input type="radio"/> |
| [name2]  | <input type="radio"/> | <input type="radio"/> | <input type="radio"/> | <input type="radio"/> | <input type="radio"/> | <input type="radio"/> | <input type="radio"/> |
| [name3]  | <input type="radio"/> | <input type="radio"/> | <input type="radio"/> | <input type="radio"/> | <input type="radio"/> | <input type="radio"/> | <input type="radio"/> |
| [name4]  | <input type="radio"/> | <input type="radio"/> | <input type="radio"/> | <input type="radio"/> | <input type="radio"/> | <input type="radio"/> | <input type="radio"/> |
| [name5]  | <input type="radio"/> | <input type="radio"/> | <input type="radio"/> | <input type="radio"/> | <input type="radio"/> | <input type="radio"/> | <input type="radio"/> |
| [name6]  | <input type="radio"/> | <input type="radio"/> | <input type="radio"/> | <input type="radio"/> | <input type="radio"/> | <input type="radio"/> | <input type="radio"/> |
| [name7]  | <input type="radio"/> | <input type="radio"/> | <input type="radio"/> | <input type="radio"/> | <input type="radio"/> | <input type="radio"/> | <input type="radio"/> |
| [name8]  | <input type="radio"/> | <input type="radio"/> | <input type="radio"/> | <input type="radio"/> | <input type="radio"/> | <input type="radio"/> | <input type="radio"/> |
| [name9]  | <input type="radio"/> | <input type="radio"/> | <input type="radio"/> | <input type="radio"/> | <input type="radio"/> | <input type="radio"/> | <input type="radio"/> |
| [name10] | <input type="radio"/> | <input type="radio"/> | <input type="radio"/> | <input type="radio"/> | <input type="radio"/> | <input type="radio"/> | <input type="radio"/> |
| [name11] | <input type="radio"/> | <input type="radio"/> | <input type="radio"/> | <input type="radio"/> | <input type="radio"/> | <input type="radio"/> | <input type="radio"/> |
| [name12] | <input type="radio"/> | <input type="radio"/> | <input type="radio"/> | <input type="radio"/> | <input type="radio"/> | <input type="radio"/> | <input type="radio"/> |
| [name13] | <input type="radio"/> | <input type="radio"/> | <input type="radio"/> | <input type="radio"/> | <input type="radio"/> | <input type="radio"/> | <input type="radio"/> |
| [name14] | <input type="radio"/> | <input type="radio"/> | <input type="radio"/> | <input type="radio"/> | <input type="radio"/> | <input type="radio"/> | <input type="radio"/> |
| [name15] | <input type="radio"/> | <input type="radio"/> | <input type="radio"/> | <input type="radio"/> | <input type="radio"/> | <input type="radio"/> | <input type="radio"/> |

---



---

**What is the ethnicity of each person in your social network?**

|          | Not Hispanic or Latino | Hispanic or Latino    | Don't know            |
|----------|------------------------|-----------------------|-----------------------|
| [name1]  | <input type="radio"/>  | <input type="radio"/> | <input type="radio"/> |
| [name2]  | <input type="radio"/>  | <input type="radio"/> | <input type="radio"/> |
| [name3]  | <input type="radio"/>  | <input type="radio"/> | <input type="radio"/> |
| [name4]  | <input type="radio"/>  | <input type="radio"/> | <input type="radio"/> |
| [name5]  | <input type="radio"/>  | <input type="radio"/> | <input type="radio"/> |
| [name6]  | <input type="radio"/>  | <input type="radio"/> | <input type="radio"/> |
| [name7]  | <input type="radio"/>  | <input type="radio"/> | <input type="radio"/> |
| [name8]  | <input type="radio"/>  | <input type="radio"/> | <input type="radio"/> |
| [name9]  | <input type="radio"/>  | <input type="radio"/> | <input type="radio"/> |
| [name10] | <input type="radio"/>  | <input type="radio"/> | <input type="radio"/> |
| [name11] | <input type="radio"/>  | <input type="radio"/> | <input type="radio"/> |
| [name12] | <input type="radio"/>  | <input type="radio"/> | <input type="radio"/> |
| [name13] | <input type="radio"/>  | <input type="radio"/> | <input type="radio"/> |
| [name14] | <input type="radio"/>  | <input type="radio"/> | <input type="radio"/> |
| [name15] | <input type="radio"/>  | <input type="radio"/> | <input type="radio"/> |

---



---

**As far as you know, what is the highest level of education of each person?**

|          | 1-8 years             | Some high school      | High school grad      | Some college          | Associate degree      | Bachelors degree      | Graduate degree       | Don't know            |
|----------|-----------------------|-----------------------|-----------------------|-----------------------|-----------------------|-----------------------|-----------------------|-----------------------|
| [name1]  | <input type="radio"/> | <input type="radio"/> | <input type="radio"/> | <input type="radio"/> | <input type="radio"/> | <input type="radio"/> | <input type="radio"/> | <input type="radio"/> |
| [name2]  | <input type="radio"/> | <input type="radio"/> | <input type="radio"/> | <input type="radio"/> | <input type="radio"/> | <input type="radio"/> | <input type="radio"/> | <input type="radio"/> |
| [name3]  | <input type="radio"/> | <input type="radio"/> | <input type="radio"/> | <input type="radio"/> | <input type="radio"/> | <input type="radio"/> | <input type="radio"/> | <input type="radio"/> |
| [name4]  | <input type="radio"/> | <input type="radio"/> | <input type="radio"/> | <input type="radio"/> | <input type="radio"/> | <input type="radio"/> | <input type="radio"/> | <input type="radio"/> |
| [name5]  | <input type="radio"/> | <input type="radio"/> | <input type="radio"/> | <input type="radio"/> | <input type="radio"/> | <input type="radio"/> | <input type="radio"/> | <input type="radio"/> |
| [name6]  | <input type="radio"/> | <input type="radio"/> | <input type="radio"/> | <input type="radio"/> | <input type="radio"/> | <input type="radio"/> | <input type="radio"/> | <input type="radio"/> |
| [name7]  | <input type="radio"/> | <input type="radio"/> | <input type="radio"/> | <input type="radio"/> | <input type="radio"/> | <input type="radio"/> | <input type="radio"/> | <input type="radio"/> |
| [name8]  | <input type="radio"/> | <input type="radio"/> | <input type="radio"/> | <input type="radio"/> | <input type="radio"/> | <input type="radio"/> | <input type="radio"/> | <input type="radio"/> |
| [name9]  | <input type="radio"/> | <input type="radio"/> | <input type="radio"/> | <input type="radio"/> | <input type="radio"/> | <input type="radio"/> | <input type="radio"/> | <input type="radio"/> |
| [name10] | <input type="radio"/> | <input type="radio"/> | <input type="radio"/> | <input type="radio"/> | <input type="radio"/> | <input type="radio"/> | <input type="radio"/> | <input type="radio"/> |
| [name11] | <input type="radio"/> | <input type="radio"/> | <input type="radio"/> | <input type="radio"/> | <input type="radio"/> | <input type="radio"/> | <input type="radio"/> | <input type="radio"/> |
| [name12] | <input type="radio"/> | <input type="radio"/> | <input type="radio"/> | <input type="radio"/> | <input type="radio"/> | <input type="radio"/> | <input type="radio"/> | <input type="radio"/> |
| [name13] | <input type="radio"/> | <input type="radio"/> | <input type="radio"/> | <input type="radio"/> | <input type="radio"/> | <input type="radio"/> | <input type="radio"/> | <input type="radio"/> |
| [name14] | <input type="radio"/> | <input type="radio"/> | <input type="radio"/> | <input type="radio"/> | <input type="radio"/> | <input type="radio"/> | <input type="radio"/> | <input type="radio"/> |
| [name15] | <input type="radio"/> | <input type="radio"/> | <input type="radio"/> | <input type="radio"/> | <input type="radio"/> | <input type="radio"/> | <input type="radio"/> | <input type="radio"/> |

---



---

**On average, how often do you speak with each person in your network?**

|          | Daily                 | Weekly                | Monthly               | Less often            | Don't know            |
|----------|-----------------------|-----------------------|-----------------------|-----------------------|-----------------------|
| [name1]  | <input type="radio"/> | <input type="radio"/> | <input type="radio"/> | <input type="radio"/> | <input type="radio"/> |
| [name2]  | <input type="radio"/> | <input type="radio"/> | <input type="radio"/> | <input type="radio"/> | <input type="radio"/> |
| [name3]  | <input type="radio"/> | <input type="radio"/> | <input type="radio"/> | <input type="radio"/> | <input type="radio"/> |
| [name4]  | <input type="radio"/> | <input type="radio"/> | <input type="radio"/> | <input type="radio"/> | <input type="radio"/> |
| [name5]  | <input type="radio"/> | <input type="radio"/> | <input type="radio"/> | <input type="radio"/> | <input type="radio"/> |
| [name6]  | <input type="radio"/> | <input type="radio"/> | <input type="radio"/> | <input type="radio"/> | <input type="radio"/> |
| [name7]  | <input type="radio"/> | <input type="radio"/> | <input type="radio"/> | <input type="radio"/> | <input type="radio"/> |
| [name8]  | <input type="radio"/> | <input type="radio"/> | <input type="radio"/> | <input type="radio"/> | <input type="radio"/> |
| [name9]  | <input type="radio"/> | <input type="radio"/> | <input type="radio"/> | <input type="radio"/> | <input type="radio"/> |
| [name10] | <input type="radio"/> | <input type="radio"/> | <input type="radio"/> | <input type="radio"/> | <input type="radio"/> |
| [name11] | <input type="radio"/> | <input type="radio"/> | <input type="radio"/> | <input type="radio"/> | <input type="radio"/> |
| [name12] | <input type="radio"/> | <input type="radio"/> | <input type="radio"/> | <input type="radio"/> | <input type="radio"/> |
| [name13] | <input type="radio"/> | <input type="radio"/> | <input type="radio"/> | <input type="radio"/> | <input type="radio"/> |
| [name14] | <input type="radio"/> | <input type="radio"/> | <input type="radio"/> | <input type="radio"/> | <input type="radio"/> |
| [name15] | <input type="radio"/> | <input type="radio"/> | <input type="radio"/> | <input type="radio"/> | <input type="radio"/> |

---



---

**How long have you known the following people (in years)?**

|          | Less than three       | Three to six          | More than six         | Don't know            |
|----------|-----------------------|-----------------------|-----------------------|-----------------------|
| [name1]  | <input type="radio"/> | <input type="radio"/> | <input type="radio"/> | <input type="radio"/> |
| [name2]  | <input type="radio"/> | <input type="radio"/> | <input type="radio"/> | <input type="radio"/> |
| [name3]  | <input type="radio"/> | <input type="radio"/> | <input type="radio"/> | <input type="radio"/> |
| [name4]  | <input type="radio"/> | <input type="radio"/> | <input type="radio"/> | <input type="radio"/> |
| [name5]  | <input type="radio"/> | <input type="radio"/> | <input type="radio"/> | <input type="radio"/> |
| [name6]  | <input type="radio"/> | <input type="radio"/> | <input type="radio"/> | <input type="radio"/> |
| [name7]  | <input type="radio"/> | <input type="radio"/> | <input type="radio"/> | <input type="radio"/> |
| [name8]  | <input type="radio"/> | <input type="radio"/> | <input type="radio"/> | <input type="radio"/> |
| [name9]  | <input type="radio"/> | <input type="radio"/> | <input type="radio"/> | <input type="radio"/> |
| [name10] | <input type="radio"/> | <input type="radio"/> | <input type="radio"/> | <input type="radio"/> |
| [name11] | <input type="radio"/> | <input type="radio"/> | <input type="radio"/> | <input type="radio"/> |
| [name12] | <input type="radio"/> | <input type="radio"/> | <input type="radio"/> | <input type="radio"/> |
| [name13] | <input type="radio"/> | <input type="radio"/> | <input type="radio"/> | <input type="radio"/> |
| [name14] | <input type="radio"/> | <input type="radio"/> | <input type="radio"/> | <input type="radio"/> |
| [name15] | <input type="radio"/> | <input type="radio"/> | <input type="radio"/> | <input type="radio"/> |

**We're now going to ask all the ways each person is connected to you. Some people can be connected to you in more than one way. For example, a man could be your brother and he could belong to your church and be your lawyer. For each person below, please tell us all the ways that person is connected to you.\*\* Co-member in organization: Someone who is a member of the same organization as you. For example, a person who attends the same church**

|          | Spouse                   | Parent                   | Sibling                  | Child                    | Other family             | Co-worker                | Comem-ber in org**       | Neigh-bor                | Friend                   | Advisor                  |
|----------|--------------------------|--------------------------|--------------------------|--------------------------|--------------------------|--------------------------|--------------------------|--------------------------|--------------------------|--------------------------|
| [name1]  | <input type="checkbox"/> | <input type="checkbox"/> | <input type="checkbox"/> | <input type="checkbox"/> | <input type="checkbox"/> | <input type="checkbox"/> | <input type="checkbox"/> | <input type="checkbox"/> | <input type="checkbox"/> | <input type="checkbox"/> |
| [name2]  | <input type="checkbox"/> | <input type="checkbox"/> | <input type="checkbox"/> | <input type="checkbox"/> | <input type="checkbox"/> | <input type="checkbox"/> | <input type="checkbox"/> | <input type="checkbox"/> | <input type="checkbox"/> | <input type="checkbox"/> |
| [name3]  | <input type="checkbox"/> | <input type="checkbox"/> | <input type="checkbox"/> | <input type="checkbox"/> | <input type="checkbox"/> | <input type="checkbox"/> | <input type="checkbox"/> | <input type="checkbox"/> | <input type="checkbox"/> | <input type="checkbox"/> |
| [name4]  | <input type="checkbox"/> | <input type="checkbox"/> | <input type="checkbox"/> | <input type="checkbox"/> | <input type="checkbox"/> | <input type="checkbox"/> | <input type="checkbox"/> | <input type="checkbox"/> | <input type="checkbox"/> | <input type="checkbox"/> |
| [name5]  | <input type="checkbox"/> | <input type="checkbox"/> | <input type="checkbox"/> | <input type="checkbox"/> | <input type="checkbox"/> | <input type="checkbox"/> | <input type="checkbox"/> | <input type="checkbox"/> | <input type="checkbox"/> | <input type="checkbox"/> |
| [name6]  | <input type="checkbox"/> | <input type="checkbox"/> | <input type="checkbox"/> | <input type="checkbox"/> | <input type="checkbox"/> | <input type="checkbox"/> | <input type="checkbox"/> | <input type="checkbox"/> | <input type="checkbox"/> | <input type="checkbox"/> |
| [name7]  | <input type="checkbox"/> | <input type="checkbox"/> | <input type="checkbox"/> | <input type="checkbox"/> | <input type="checkbox"/> | <input type="checkbox"/> | <input type="checkbox"/> | <input type="checkbox"/> | <input type="checkbox"/> | <input type="checkbox"/> |
| [name8]  | <input type="checkbox"/> | <input type="checkbox"/> | <input type="checkbox"/> | <input type="checkbox"/> | <input type="checkbox"/> | <input type="checkbox"/> | <input type="checkbox"/> | <input type="checkbox"/> | <input type="checkbox"/> | <input type="checkbox"/> |
| [name9]  | <input type="checkbox"/> | <input type="checkbox"/> | <input type="checkbox"/> | <input type="checkbox"/> | <input type="checkbox"/> | <input type="checkbox"/> | <input type="checkbox"/> | <input type="checkbox"/> | <input type="checkbox"/> | <input type="checkbox"/> |
| [name10] | <input type="checkbox"/> | <input type="checkbox"/> | <input type="checkbox"/> | <input type="checkbox"/> | <input type="checkbox"/> | <input type="checkbox"/> | <input type="checkbox"/> | <input type="checkbox"/> | <input type="checkbox"/> | <input type="checkbox"/> |
| [name11] | <input type="checkbox"/> | <input type="checkbox"/> | <input type="checkbox"/> | <input type="checkbox"/> | <input type="checkbox"/> | <input type="checkbox"/> | <input type="checkbox"/> | <input type="checkbox"/> | <input type="checkbox"/> | <input type="checkbox"/> |
| [name12] | <input type="checkbox"/> | <input type="checkbox"/> | <input type="checkbox"/> | <input type="checkbox"/> | <input type="checkbox"/> | <input type="checkbox"/> | <input type="checkbox"/> | <input type="checkbox"/> | <input type="checkbox"/> | <input type="checkbox"/> |
| [name13] | <input type="checkbox"/> | <input type="checkbox"/> | <input type="checkbox"/> | <input type="checkbox"/> | <input type="checkbox"/> | <input type="checkbox"/> | <input type="checkbox"/> | <input type="checkbox"/> | <input type="checkbox"/> | <input type="checkbox"/> |
| [name14] | <input type="checkbox"/> | <input type="checkbox"/> | <input type="checkbox"/> | <input type="checkbox"/> | <input type="checkbox"/> | <input type="checkbox"/> | <input type="checkbox"/> | <input type="checkbox"/> | <input type="checkbox"/> | <input type="checkbox"/> |
| [name15] | <input type="checkbox"/> | <input type="checkbox"/> | <input type="checkbox"/> | <input type="checkbox"/> | <input type="checkbox"/> | <input type="checkbox"/> | <input type="checkbox"/> | <input type="checkbox"/> | <input type="checkbox"/> | <input type="checkbox"/> |

### Has anyone been diagnosed with MS?

|          | Yes                   | No                    | Don't know            |
|----------|-----------------------|-----------------------|-----------------------|
| [name1]  | <input type="radio"/> | <input type="radio"/> | <input type="radio"/> |
| [name2]  | <input type="radio"/> | <input type="radio"/> | <input type="radio"/> |
| [name3]  | <input type="radio"/> | <input type="radio"/> | <input type="radio"/> |
| [name4]  | <input type="radio"/> | <input type="radio"/> | <input type="radio"/> |
| [name5]  | <input type="radio"/> | <input type="radio"/> | <input type="radio"/> |
| [name6]  | <input type="radio"/> | <input type="radio"/> | <input type="radio"/> |
| [name7]  | <input type="radio"/> | <input type="radio"/> | <input type="radio"/> |
| [name8]  | <input type="radio"/> | <input type="radio"/> | <input type="radio"/> |
| [name9]  | <input type="radio"/> | <input type="radio"/> | <input type="radio"/> |
| [name10] | <input type="radio"/> | <input type="radio"/> | <input type="radio"/> |
| [name11] | <input type="radio"/> | <input type="radio"/> | <input type="radio"/> |

|          |                       |                       |                       |
|----------|-----------------------|-----------------------|-----------------------|
| [name12] | <input type="radio"/> | <input type="radio"/> | <input type="radio"/> |
| [name13] | <input type="radio"/> | <input type="radio"/> | <input type="radio"/> |
| [name14] | <input type="radio"/> | <input type="radio"/> | <input type="radio"/> |
| [name15] | <input type="radio"/> | <input type="radio"/> | <input type="radio"/> |

**How many years ago was the diagnosis of MS?**

**If within this year, then round up to 1.**

|          |       |
|----------|-------|
| [name1]  | _____ |
| [name2]  | _____ |
| [name3]  | _____ |
| [name4]  | _____ |
| [name5]  | _____ |
| [name6]  | _____ |
| [name7]  | _____ |
| [name8]  | _____ |
| [name9]  | _____ |
| [name10] | _____ |
| [name11] | _____ |
| [name12] | _____ |
| [name13] | _____ |
| [name14] | _____ |
| [name15] | _____ |

Please select the best option that applies to [name1]'s mobility.

- Normal: functionally normal with no limitations on activity or lifestyle\_ May have minor abnormality on examination\_ Course is relapsing-remitting with a return to baseline with or without treatment\_ Are not treated with any ongoing therapy for MS
- Mild disability: mild symptoms or signs\_ Have definite findings such as sensory abnormalities, mild bladder impairment, minor incoordination, weakness, or fatigue\_ No visible abnormality of walking\_ The pattern of disease is relapsing-remitting, but may not have a full return to baseline following attacks\_ May use ongoing therapy such as amantadine, baclofen, or oxybutynin
- Moderate disability: visibly abnormal walking but do not require walking aids \_ The pattern of disease is relapsing-remitting or progressive
- Early cane: intermittent use of cane\_ Other forms of unilateral support including splint, brace, or crutch \_ Use unilateral support primarily for longer distances, but are able to walk at least 25 feet without it\_ The pattern of disease is relapsing-remitting or progressive
- Late cane: dependent on a cane or other forms of unilateral support and cannot walk 25 feet without such support \_ Patients may hang on to furniture inside their homes or touch the wall when walking in clinic\_ May use a scooter for greater distances (e.g., malls) \_ Pattern of disease is relapsing remitting or progressive
- Bilateral support: requires bilateral support to walk 25 feet\_ May use two canes or two crutches or a walker \_ May use a scooter for greater distances\_ Pattern of disease is relapsing-remitting or progressive
- Confined to wheelchair: essentially confined to a wheelchair or scooter \_ May be able to take a few steps but are unable to ambulate 25 feet, even with bilateral support \_ May show further progression including worsening hand function or inability to transfer independently
- Unclassifiable: does not fit the above classifications\_ Significant memory or visual impairment, overwhelming fatigue, or significant bowel or bladder impairment in an otherwise minimally impaired patient

Please select the best option that applies to [name2]'s mobility.

- Normal: functionally normal with no limitations on activity or lifestyle\_ May have minor abnormality on examination \_ Course is relapsing-remitting with a return to baseline with or without treatment\_ Are not treated with any ongoing therapy for MS
- Mild disability: mild symptoms or signs\_ Have definite findings such as sensory abnormalities, mild bladder impairment, minor incoordination, weakness, or fatigue\_ No visible abnormality of walking\_ The pattern of disease is relapsing-remitting, but may not have a full return to baseline following attacks\_ May use ongoing therapy such as amantadine, baclofen, or oxybutynin
- Moderate disability: visibly abnormal walking but do not require walking aids \_ The pattern of disease is relapsing-remitting or progressive
- Early cane: intermittent use of cane\_ Other forms of unilateral support including splint, brace, or crutch \_ Use unilateral support primarily for longer distances, but are able to walk at least 25 feet without it\_ The pattern of disease is relapsing-remitting or progressive
- Late cane: dependent on a cane or other forms of unilateral support and cannot walk 25 feet without such support \_ Patients may hang on to furniture inside their homes or touch the wall when walking in clinic\_ May use a scooter for greater distances (e.g., malls) \_ Pattern of disease is relapsing remitting or progressive
- Bilateral support: requires bilateral support to walk 25 feet\_ May use two canes or two crutches or a walker \_ May use a scooter for greater distances\_ Pattern of disease is relapsing-remitting or progressive
- Confined to wheelchair: essentially confined to a wheelchair or scooter \_ May be able to take a few steps but are unable to ambulate 25 feet, even with bilateral support \_ May show further progression including worsening hand function or inability to transfer independently
- Unclassifiable: does not fit the above classifications\_ Significant memory or visual impairment, overwhelming fatigue, or significant bowel or bladder impairment in an otherwise minimally impaired patient

Please select the best option that applies to [name3]'s mobility.

- Normal: functionally normal with no limitations on activity or lifestyle\_ May have minor abnormality on examination \_ Course is relapsing-remitting with a return to baseline with or without treatment\_ Are not treated with any ongoing therapy for MS
- Mild disability: mild symptoms or signs\_ Have definite findings such as sensory abnormalities, mild bladder impairment, minor incoordination, weakness, or fatigue\_ No visible abnormality of walking\_ The pattern of disease is relapsing-remitting, but may not have a full return to baseline following attacks\_ May use ongoing therapy such as amantadine, baclofen, or oxybutynin
- Moderate disability: visibly abnormal walking but do not require walking aids \_ The pattern of disease is relapsing-remitting or progressive
- Early cane: intermittent use of cane\_ Other forms of unilateral support including splint, brace, or crutch \_ Use unilateral support primarily for longer distances, but are able to walk at least 25 feet without it\_ The pattern of disease is relapsing-remitting or progressive
- Late cane: dependent on a cane or other forms of unilateral support and cannot walk 25 feet without such support \_ Patients may hang on to furniture inside their homes or touch the wall when walking in clinic\_ May use a scooter for greater distances (e.g., malls) \_ Pattern of disease is relapsing remitting or progressive
- Bilateral support: requires bilateral support to walk 25 feet\_ May use two canes or two crutches or a walker \_ May use a scooter for greater distances\_ Pattern of disease is relapsing-remitting or progressive
- Confined to wheelchair: essentially confined to a wheelchair or scooter \_ May be able to take a few steps but are unable to ambulate 25 feet, even with bilateral support \_ May show further progression including worsening hand function or inability to transfer independently
- Unclassifiable: does not fit the above classifications\_ Significant memory or visual impairment, overwhelming fatigue, or significant bowel or bladder impairment in an otherwise minimally impaired patient

Please select the best option that applies to [name4]'s mobility.

- Normal: functionally normal with no limitations on activity or lifestyle\_ May have minor abnormality on examination \_ Course is relapsing-remitting with a return to baseline with or without treatment\_ Are not treated with any ongoing therapy for MS
- Mild disability: mild symptoms or signs\_ Have definite findings such as sensory abnormalities, mild bladder impairment, minor incoordination, weakness, or fatigue\_ No visible abnormality of walking\_ The pattern of disease is relapsing-remitting, but may not have a full return to baseline following attacks\_ May use ongoing therapy such as amantadine, baclofen, or oxybutynin
- Moderate disability: visibly abnormal walking but do not require walking aids \_ The pattern of disease is relapsing-remitting or progressive
- Early cane: intermittent use of cane\_ Other forms of unilateral support including splint, brace, or crutch \_ Use unilateral support primarily for longer distances, but are able to walk at least 25 feet without it\_ The pattern of disease is relapsing-remitting or progressive
- Late cane: dependent on a cane or other forms of unilateral support and cannot walk 25 feet without such support \_ Patients may hang on to furniture inside their homes or touch the wall when walking in clinic\_ May use a scooter for greater distances (e.g., malls) \_ Pattern of disease is relapsing remitting or progressive
- Bilateral support: requires bilateral support to walk 25 feet\_ May use two canes or two crutches or a walker \_ May use a scooter for greater distances\_ Pattern of disease is relapsing-remitting or progressive
- Confined to wheelchair: essentially confined to a wheelchair or scooter \_ May be able to take a few steps but

are unable to ambulate 25 feet, even with bilateral support \_ May show further progression including worsening hand function or inability to transfer independently

- Unclassifiable: does not fit the above classifications \_ Significant memory or visual impairment, overwhelming fatigue, or significant bowel or bladder impairment in an otherwise minimally impaired patient

Please select the best option that applies to [name5]'s mobility.

- Normal: functionally normal with no limitations on activity or lifestyle\_ May have minor abnormality on examination \_ Course is relapsing-remitting with a return to baseline with or without treatment\_ Are not treated with any ongoing therapy for MS
- Mild disability: mild symptoms or signs\_ Have definite findings such as sensory abnormalities, mild bladder impairment, minor incoordination, weakness, or fatigue\_ No visible abnormality of walking\_ The pattern of disease is relapsing-remitting, but may not have a full return to baseline following attacks\_ May use ongoing therapy such as amantadine, baclofen, or oxybutynin
- Moderate disability: visibly abnormal walking but do not require walking aids \_ The pattern of disease is relapsing-remitting or progressive
- Early cane: intermittent use of cane\_ Other forms of unilateral support including splint, brace, or crutch \_ Use unilateral support primarily for longer distances, but are able to walk at least 25 feet without it\_ The pattern of disease is relapsing-remitting or progressive
- Late cane: dependent on a cane or other forms of unilateral support and cannot walk 25 feet without such support \_ Patients may hang on to furniture inside their homes or touch the wall when walking in clinic\_ May use a scooter for greater distances (e.g., malls) \_ Pattern of disease is relapsing remitting or progressive
- Bilateral support: requires bilateral support to walk 25 feet\_ May use two canes or two crutches or a walker \_ May use a scooter for greater distances\_ Pattern of disease is relapsing-remitting or progressive
- Confined to wheelchair: essentially confined to a wheelchair or scooter \_ May be able to take a few steps but are unable to ambulate 25 feet, even with bilateral support \_ May show further progression including worsening hand function or inability to transfer independently
- Unclassifiable: does not fit the above classifications \_ Significant memory or visual impairment, overwhelming fatigue, or significant bowel or bladder impairment in an otherwise minimally impaired patient

Please select the best option that applies to [name6]'s mobility.

- Normal: functionally normal with no limitations on activity or lifestyle\_ May have minor abnormality on examination \_ Course is relapsing-remitting with a return to baseline with or without treatment\_ Are not treated with any ongoing therapy for MS
- Mild disability: mild symptoms or signs\_ Have definite findings such as sensory abnormalities, mild bladder impairment, minor incoordination, weakness, or fatigue\_ No visible abnormality of walking\_ The pattern of disease is relapsing-remitting, but may not have a full return to baseline following attacks\_ May use ongoing therapy such as amantadine, baclofen, or oxybutynin
- Moderate disability: visibly abnormal walking but do not require walking aids \_ The pattern of disease is relapsing-remitting or progressive
- Early cane: intermittent use of cane\_ Other forms of unilateral support including splint, brace, or crutch \_ Use unilateral support primarily for longer distances, but are able to walk at least 25 feet without it\_ The pattern of disease is relapsing-remitting or progressive
- Late cane: dependent on a cane or other forms of unilateral support and cannot walk 25 feet without such support \_ Patients may hang on to furniture inside their homes or touch the wall when walking in clinic\_ May use a scooter for greater distances (e.g., malls) \_ Pattern of disease is relapsing remitting or progressive
- Bilateral support: requires bilateral support to walk 25 feet\_ May use two canes or two crutches or a walker \_ May use a scooter for greater distances\_ Pattern of disease is relapsing-remitting or progressive
- Confined to wheelchair: essentially confined to a wheelchair or scooter \_ May be able to take a few steps but are unable to ambulate 25 feet, even with bilateral support \_ May show further progression including worsening hand function or inability to transfer independently
- Unclassifiable: does not fit the above classifications \_ Significant memory or visual impairment, overwhelming fatigue, or significant bowel or bladder impairment in an otherwise minimally impaired patient



Please select the best option that applies to [name7]'s mobility.

- Normal: functionally normal with no limitations on activity or lifestyle\_ May have minor abnormality on examination \_ Course is relapsing-remitting with a return to baseline with or without treatment\_ Are not treated with any ongoing therapy for MS
- Mild disability: mild symptoms or signs\_ Have definite findings such as sensory abnormalities, mild bladder impairment, minor incoordination, weakness, or fatigue\_ No visible abnormality of walking\_ The pattern of disease is relapsing-remitting, but may not have a full return to baseline following attacks\_ May use ongoing therapy such as amantadine, baclofen, or oxybutynin
- Moderate disability: visibly abnormal walking but do not require walking aids \_ The pattern of disease is relapsing-remitting or progressive
- Early cane: intermittent use of cane\_ Other forms of unilateral support including splint, brace, or crutch \_ Use unilateral support primarily for longer distances, but are able to walk at least 25 feet without it\_ The pattern of disease is relapsing-remitting or progressive
- Late cane: dependent on a cane or other forms of unilateral support and cannot walk 25 feet without such support \_ Patients may hang on to furniture inside their homes or touch the wall when walking in clinic\_ May use a scooter for greater distances (e.g., malls) \_ Pattern of disease is relapsing remitting or progressive
- Bilateral support: requires bilateral support to walk 25 feet\_ May use two canes or two crutches or a walker \_ May use a scooter for greater distances\_ Pattern of disease is relapsing-remitting or progressive
- Confined to wheelchair: essentially confined to a wheelchair or scooter \_ May be able to take a few steps but are unable to ambulate 25 feet, even with bilateral support \_ May show further progression including worsening hand function or inability to transfer independently
- Unclassifiable: does not fit the above classifications\_ Significant memory or visual impairment, overwhelming fatigue, or significant bowel or bladder impairment in an otherwise minimally impaired patient

Please select the best option that applies to [name8]'s mobility.

- Normal: functionally normal with no limitations on activity or lifestyle\_ May have minor abnormality on examination \_ Course is relapsing-remitting with a return to baseline with or without treatment\_ Are not treated with any ongoing therapy for MS
- Mild disability: mild symptoms or signs\_ Have definite findings such as sensory abnormalities, mild bladder impairment, minor incoordination, weakness, or fatigue\_ No visible abnormality of walking\_ The pattern of disease is relapsing-remitting, but may not have a full return to baseline following attacks\_ May use ongoing therapy such as amantadine, baclofen, or oxybutynin
- Moderate disability: visibly abnormal walking but do not require walking aids \_ The pattern of disease is relapsing-remitting or progressive
- Early cane: intermittent use of cane\_ Other forms of unilateral support including splint, brace, or crutch \_ Use unilateral support primarily for longer distances, but are able to walk at least 25 feet without it\_ The pattern of disease is relapsing-remitting or progressive
- Late cane: dependent on a cane or other forms of unilateral support and cannot walk 25 feet without such support \_ Patients may hang on to furniture inside their homes or touch the wall when walking in clinic\_ May use a scooter for greater distances (e.g., malls) \_ Pattern of disease is relapsing remitting or progressive
- Bilateral support: requires bilateral support to walk 25 feet\_ May use two canes or two crutches or a walker \_ May use a scooter for greater distances\_ Pattern of disease is relapsing-remitting or progressive
- Confined to wheelchair: essentially confined to a wheelchair or scooter \_ May be able to take a few steps but are unable to ambulate 25 feet, even with bilateral support \_ May show further progression including worsening hand function or inability to transfer independently
- Unclassifiable: does not fit the above classifications\_ Significant memory or visual impairment, overwhelming fatigue, or significant bowel or bladder impairment in an otherwise minimally impaired patient

Please select the best option that applies to [name9]'s mobility.

- Normal: functionally normal with no limitations on activity or lifestyle\_ May have minor abnormality on examination \_ Course is relapsing-remitting with a return to baseline with or without treatment\_ Are not treated with any ongoing therapy for MS
- Mild disability: mild symptoms or signs\_ Have definite findings such as sensory abnormalities, mild bladder impairment, minor incoordination, weakness, or fatigue\_ No visible abnormality of walking\_ The pattern of disease is relapsing-remitting, but may not have a full return to baseline following attacks\_ May use ongoing therapy such as amantadine, baclofen, or oxybutynin
- Moderate disability: visibly abnormal walking but do not require walking aids \_ The pattern of disease is relapsing-remitting or progressive
- Early cane: intermittent use of cane\_ Other forms of unilateral support including splint, brace, or crutch \_ Use unilateral support primarily for longer distances, but are able to walk at least 25 feet without it\_ The pattern of disease is relapsing-remitting or progressive
- Late cane: dependent on a cane or other forms of unilateral support and cannot walk 25 feet without such support \_ Patients may hang on to furniture inside their homes or touch the wall when walking in clinic\_ May use a scooter for greater distances (e.g., malls) \_ Pattern of disease is relapsing remitting or progressive
- Bilateral support: requires bilateral support to walk 25 feet\_ May use two canes or two crutches or a walker \_ May use a scooter for greater distances\_ Pattern of disease is relapsing-remitting or progressive
- Confined to wheelchair: essentially confined to a wheelchair or scooter \_ May be able to take a few steps but

are unable to ambulate 25 feet, even with bilateral support \_ May show further progression including worsening hand function or inability to transfer independently

- Unclassifiable: does not fit the above classifications \_ Significant memory or visual impairment, overwhelming fatigue, or significant bowel or bladder impairment in an otherwise minimally impaired patient

Please select the best option that applies to [name10]'s mobility.

- Normal: functionally normal with no limitations on activity or lifestyle\_ May have minor abnormality on examination \_ Course is relapsing-remitting with a return to baseline with or without treatment\_ Are not treated with any ongoing therapy for MS
- Mild disability: mild symptoms or signs\_ Have definite findings such as sensory abnormalities, mild bladder impairment, minor incoordination, weakness, or fatigue\_ No visible abnormality of walking\_ The pattern of disease is relapsing-remitting, but may not have a full return to baseline following attacks\_ May use ongoing therapy such as amantadine, baclofen, or oxybutynin
- Moderate disability: visibly abnormal walking but do not require walking aids \_ The pattern of disease is relapsing-remitting or progressive
- Early cane: intermittent use of cane\_ Other forms of unilateral support including splint, brace, or crutch \_ Use unilateral support primarily for longer distances, but are able to walk at least 25 feet without it\_ The pattern of disease is relapsing-remitting or progressive
- Late cane: dependent on a cane or other forms of unilateral support and cannot walk 25 feet without such support \_ Patients may hang on to furniture inside their homes or touch the wall when walking in clinic\_ May use a scooter for greater distances (e.g., malls) \_ Pattern of disease is relapsing remitting or progressive
- Bilateral support: requires bilateral support to walk 25 feet\_ May use two canes or two crutches or a walker \_ May use a scooter for greater distances\_ Pattern of disease is relapsing-remitting or progressive
- Confined to wheelchair: essentially confined to a wheelchair or scooter \_ May be able to take a few steps but are unable to ambulate 25 feet, even with bilateral support \_ May show further progression including worsening hand function or inability to transfer independently
- Unclassifiable: does not fit the above classifications \_ Significant memory or visual impairment, overwhelming fatigue, or significant bowel or bladder impairment in an otherwise minimally impaired patient

Please select the best option that applies to [name11]'s mobility.

- Normal: functionally normal with no limitations on activity or lifestyle\_ May have minor abnormality on examination \_ Course is relapsing-remitting with a return to baseline with or without treatment\_ Are not treated with any ongoing therapy for MS
- Mild disability: mild symptoms or signs\_ Have definite findings such as sensory abnormalities, mild bladder impairment, minor incoordination, weakness, or fatigue\_ No visible abnormality of walking\_ The pattern of disease is relapsing-remitting, but may not have a full return to baseline following attacks\_ May use ongoing therapy such as amantadine, baclofen, or oxybutynin
- Moderate disability: visibly abnormal walking but do not require walking aids \_ The pattern of disease is relapsing-remitting or progressive
- Early cane: intermittent use of cane\_ Other forms of unilateral support including splint, brace, or crutch \_ Use unilateral support primarily for longer distances, but are able to walk at least 25 feet without it\_ The pattern of disease is relapsing-remitting or progressive
- Late cane: dependent on a cane or other forms of unilateral support and cannot walk 25 feet without such support \_ Patients may hang on to furniture inside their homes or touch the wall when walking in clinic\_ May use a scooter for greater distances (e.g., malls) \_ Pattern of disease is relapsing remitting or progressive
- Bilateral support: requires bilateral support to walk 25 feet\_ May use two canes or two crutches or a walker \_ May use a scooter for greater distances\_ Pattern of disease is relapsing-remitting or progressive
- Confined to wheelchair: essentially confined to a wheelchair or scooter \_ May be able to take a few steps but are unable to ambulate 25 feet, even with bilateral support \_ May show further progression including worsening hand function or inability to transfer independently
- Unclassifiable: does not fit the above classifications \_ Significant memory or visual impairment, overwhelming fatigue, or significant bowel or bladder impairment in an otherwise minimally impaired patient

Please select the best option that applies to [name12]'s mobility.

- Normal: functionally normal with no limitations on activity or lifestyle\_ May have minor abnormality on examination \_ Course is relapsing-remitting with a return to baseline with or without treatment\_ Are not treated with any ongoing therapy for MS
- Mild disability: mild symptoms or signs\_ Have definite findings such as sensory abnormalities, mild bladder impairment, minor incoordination, weakness, or fatigue\_ No visible abnormality of walking\_ The pattern of disease is relapsing-remitting, but may not have a full return to baseline following attacks\_ May use ongoing therapy such as amantadine, baclofen, or oxybutynin
- Moderate disability: visibly abnormal walking but do not require walking aids \_ The pattern of disease is relapsing-remitting or progressive
- Early cane: intermittent use of cane\_ Other forms of unilateral support including splint, brace, or crutch \_ Use unilateral support primarily for longer distances, but are able to walk at least 25 feet without it\_ The pattern of disease is relapsing-remitting or progressive
- Late cane: dependent on a cane or other forms of unilateral support and cannot walk 25 feet without such support \_ Patients may hang on to furniture inside their homes or touch the wall when walking in clinic\_ May use a scooter for greater distances (e.g., malls) \_ Pattern of disease is relapsing remitting or progressive
- Bilateral support: requires bilateral support to walk 25 feet\_ May use two canes or two crutches or a walker \_ May use a scooter for greater distances\_ Pattern of disease is relapsing-remitting or progressive
- Confined to wheelchair: essentially confined to a wheelchair or scooter \_ May be able to take a few steps but are unable to ambulate 25 feet, even with bilateral support \_ May show further progression including worsening hand function or inability to transfer independently
- Unclassifiable: does not fit the above classifications\_ Significant memory or visual impairment, overwhelming fatigue, or significant bowel or bladder impairment in an otherwise minimally impaired patient

Please select the best option that applies to [name13]'s mobility.

- Normal: functionally normal with no limitations on activity or lifestyle\_ May have minor abnormality on examination \_ Course is relapsing-remitting with a return to baseline with or without treatment\_ Are not treated with any ongoing therapy for MS
- Mild disability: mild symptoms or signs\_ Have definite findings such as sensory abnormalities, mild bladder impairment, minor incoordination, weakness, or fatigue\_ No visible abnormality of walking\_ The pattern of disease is relapsing-remitting, but may not have a full return to baseline following attacks\_ May use ongoing therapy such as amantadine, baclofen, or oxybutynin
- Moderate disability: visibly abnormal walking but do not require walking aids \_ The pattern of disease is relapsing-remitting or progressive
- Early cane: intermittent use of cane\_ Other forms of unilateral support including splint, brace, or crutch \_ Use unilateral support primarily for longer distances, but are able to walk at least 25 feet without it\_ The pattern of disease is relapsing-remitting or progressive
- Late cane: dependent on a cane or other forms of unilateral support and cannot walk 25 feet without such support \_ Patients may hang on to furniture inside their homes or touch the wall when walking in clinic\_ May use a scooter for greater distances (e.g., malls) \_ Pattern of disease is relapsing remitting or progressive
- Bilateral support: requires bilateral support to walk 25 feet\_ May use two canes or two crutches or a walker \_ May use a scooter for greater distances\_ Pattern of disease is relapsing-remitting or progressive
- Confined to wheelchair: essentially confined to a wheelchair or scooter \_ May be able to take a few steps but are unable to ambulate 25 feet, even with bilateral support \_ May show further progression including worsening hand function or inability to transfer independently
- Unclassifiable: does not fit the above classifications\_ Significant memory or visual impairment, overwhelming fatigue, or significant bowel or bladder impairment in an otherwise minimally impaired patient

Please select the best option that applies to [name14]'s mobility.

- Normal: functionally normal with no limitations on activity or lifestyle\_ May have minor abnormality on examination \_ Course is relapsing-remitting with a return to baseline with or without treatment\_ Are not treated with any ongoing therapy for MS
- Mild disability: mild symptoms or signs\_ Have definite findings such as sensory abnormalities, mild bladder impairment, minor incoordination, weakness, or fatigue\_ No visible abnormality of walking\_ The pattern of disease is relapsing-remitting, but may not have a full return to baseline following attacks\_ May use ongoing therapy such as amantadine, baclofen, or oxybutynin
- Moderate disability: visibly abnormal walking but do not require walking aids \_ The pattern of disease is relapsing-remitting or progressive
- Early cane: intermittent use of cane\_ Other forms of unilateral support including splint, brace, or crutch \_ Use unilateral support primarily for longer distances, but are able to walk at least 25 feet without it\_ The pattern of disease is relapsing-remitting or progressive
- Late cane: dependent on a cane or other forms of unilateral support and cannot walk 25 feet without such support \_ Patients may hang on to furniture inside their homes or touch the wall when walking in clinic\_ May use a scooter for greater distances (e.g., malls) \_ Pattern of disease is relapsing remitting or progressive
- Bilateral support: requires bilateral support to walk 25 feet\_ May use two canes or two crutches or a walker \_ May use a scooter for greater distances\_ Pattern of disease is relapsing-remitting or progressive
- Confined to wheelchair: essentially confined to a wheelchair or scooter \_ May be able to take a few steps but

are unable to ambulate 25 feet, even with bilateral support \_ May show further progression including worsening hand function or inability to transfer independently

- Unclassifiable: does not fit the above classifications \_ Significant memory or visual impairment, overwhelming fatigue, or significant bowel or bladder impairment in an otherwise minimally impaired patient

Please select the best option that applies to [name15]'s mobility.

- Normal: functionally normal with no limitations on activity or lifestyle \_ May have minor abnormality on examination \_ Course is relapsing-remitting with a return to baseline with or without treatment \_ Are not treated with any ongoing therapy for MS
- Mild disability: mild symptoms or signs \_ Have definite findings such as sensory abnormalities, mild bladder impairment, minor incoordination, weakness, or fatigue \_ No visible abnormality of walking \_ The pattern of disease is relapsing-remitting, but may not have a full return to baseline following attacks \_ May use ongoing therapy such as amantadine, baclofen, or oxybutynin
- Moderate disability: visibly abnormal walking but do not require walking aids \_ The pattern of disease is relapsing-remitting or progressive
- Early cane: intermittent use of cane \_ Other forms of unilateral support including splint, brace, or crutch \_ Use unilateral support primarily for longer distances, but are able to walk at least 25 feet without it \_ The pattern of disease is relapsing-remitting or progressive
- Late cane: dependent on a cane or other forms of unilateral support and cannot walk 25 feet without such support \_ Patients may hang on to furniture inside their homes or touch the wall when walking in clinic \_ May use a scooter for greater distances (e.g., malls) \_ Pattern of disease is relapsing remitting or progressive
- Bilateral support: requires bilateral support to walk 25 feet \_ May use two canes or two crutches or a walker \_ May use a scooter for greater distances \_ Pattern of disease is relapsing-remitting or progressive
- Confined to wheelchair: essentially confined to a wheelchair or scooter \_ May be able to take a few steps but are unable to ambulate 25 feet, even with bilateral support \_ May show further progression including worsening hand function or inability to transfer independently
- Unclassifiable: does not fit the above classifications \_ Significant memory or visual impairment, overwhelming fatigue, or significant bowel or bladder impairment in an otherwise minimally impaired patient

---

---

**We understand you have a first-degree relative with MS. Please answer the following about your relationship with this person.**

Compared to the others you mentioned, how close do you feel to this person?

- Especially close
- Not especially close

On average, how often do you speak with this person?

- Daily
- Weekly
- Monthly
- Less often
- Don't know

How far do you live from this person?

- Same house
- 1-5 miles
- 5-15 miles
- 16-50 miles
- 50+ miles

---

---

**How old is each person? If you don't know the exact age, what is your best guess plus or minus 5 years?**

[name1]

\_\_\_\_\_

[name2]

\_\_\_\_\_

[name3]

\_\_\_\_\_

[name4]

\_\_\_\_\_

|          |       |
|----------|-------|
| [name5]  | _____ |
| [name6]  | _____ |
| [name7]  | _____ |
| [name8]  | _____ |
| [name9]  | _____ |
| [name10] | _____ |
| [name11] | _____ |
| [name12] | _____ |
| [name13] | _____ |
| [name14] | _____ |
| [name15] | _____ |

---

---

**Have you done any of the following to try and improve your health in the last 3 months?**

**If you do not smoke, do not take medications, or did not have any doctor's appointments in the last 3 months, please click "Not Applicable"**

- Cut back on smoking?
  - Yes
  - No
  - Not applicable
  
- Exercised at least 3 times per week?
  - Yes
  - No
  
- Regularly taken your medications, meaning missed them less than once per month?
  - Yes
  - No
  - Not applicable
  
- Attended all doctor appointments?
  - Yes
  - No
  - Not applicable

---

**Have your contacts tried to improve their health in the last 3 months? Has anyone cut back smoking? If they do not smoke, please click "Not Applicable".**

|          | Yes                   | No                    | Don't know            | Not applicable        |
|----------|-----------------------|-----------------------|-----------------------|-----------------------|
| [name1]  | <input type="radio"/> | <input type="radio"/> | <input type="radio"/> | <input type="radio"/> |
| [name2]  | <input type="radio"/> | <input type="radio"/> | <input type="radio"/> | <input type="radio"/> |
| [name3]  | <input type="radio"/> | <input type="radio"/> | <input type="radio"/> | <input type="radio"/> |
| [name4]  | <input type="radio"/> | <input type="radio"/> | <input type="radio"/> | <input type="radio"/> |
| [name5]  | <input type="radio"/> | <input type="radio"/> | <input type="radio"/> | <input type="radio"/> |
| [name6]  | <input type="radio"/> | <input type="radio"/> | <input type="radio"/> | <input type="radio"/> |
| [name7]  | <input type="radio"/> | <input type="radio"/> | <input type="radio"/> | <input type="radio"/> |
| [name8]  | <input type="radio"/> | <input type="radio"/> | <input type="radio"/> | <input type="radio"/> |
| [name9]  | <input type="radio"/> | <input type="radio"/> | <input type="radio"/> | <input type="radio"/> |
| [name10] | <input type="radio"/> | <input type="radio"/> | <input type="radio"/> | <input type="radio"/> |
| [name11] | <input type="radio"/> | <input type="radio"/> | <input type="radio"/> | <input type="radio"/> |
| [name12] | <input type="radio"/> | <input type="radio"/> | <input type="radio"/> | <input type="radio"/> |
| [name13] | <input type="radio"/> | <input type="radio"/> | <input type="radio"/> | <input type="radio"/> |
| [name14] | <input type="radio"/> | <input type="radio"/> | <input type="radio"/> | <input type="radio"/> |
| [name15] | <input type="radio"/> | <input type="radio"/> | <input type="radio"/> | <input type="radio"/> |

---

**Do your social contacts exercise 3 times per week within the last 3 months?**

|          | Yes                   | No                    | Don't know            |
|----------|-----------------------|-----------------------|-----------------------|
| [name1]  | <input type="radio"/> | <input type="radio"/> | <input type="radio"/> |
| [name2]  | <input type="radio"/> | <input type="radio"/> | <input type="radio"/> |
| [name3]  | <input type="radio"/> | <input type="radio"/> | <input type="radio"/> |
| [name4]  | <input type="radio"/> | <input type="radio"/> | <input type="radio"/> |
| [name5]  | <input type="radio"/> | <input type="radio"/> | <input type="radio"/> |
| [name6]  | <input type="radio"/> | <input type="radio"/> | <input type="radio"/> |
| [name7]  | <input type="radio"/> | <input type="radio"/> | <input type="radio"/> |
| [name8]  | <input type="radio"/> | <input type="radio"/> | <input type="radio"/> |
| [name9]  | <input type="radio"/> | <input type="radio"/> | <input type="radio"/> |
| [name10] | <input type="radio"/> | <input type="radio"/> | <input type="radio"/> |
| [name11] | <input type="radio"/> | <input type="radio"/> | <input type="radio"/> |
| [name12] | <input type="radio"/> | <input type="radio"/> | <input type="radio"/> |
| [name13] | <input type="radio"/> | <input type="radio"/> | <input type="radio"/> |
| [name14] | <input type="radio"/> | <input type="radio"/> | <input type="radio"/> |
| [name15] | <input type="radio"/> | <input type="radio"/> | <input type="radio"/> |

---

**Do your contacts regularly take their medications, meaning missed them less than once per week in the last 3 months? If a person does not take medications, please select "Not applicable".**

|          | Yes                   | No                    | Don't know            | Not applicable        |
|----------|-----------------------|-----------------------|-----------------------|-----------------------|
| [name1]  | <input type="radio"/> | <input type="radio"/> | <input type="radio"/> | <input type="radio"/> |
| [name2]  | <input type="radio"/> | <input type="radio"/> | <input type="radio"/> | <input type="radio"/> |
| [name3]  | <input type="radio"/> | <input type="radio"/> | <input type="radio"/> | <input type="radio"/> |
| [name4]  | <input type="radio"/> | <input type="radio"/> | <input type="radio"/> | <input type="radio"/> |
| [name5]  | <input type="radio"/> | <input type="radio"/> | <input type="radio"/> | <input type="radio"/> |
| [name6]  | <input type="radio"/> | <input type="radio"/> | <input type="radio"/> | <input type="radio"/> |
| [name7]  | <input type="radio"/> | <input type="radio"/> | <input type="radio"/> | <input type="radio"/> |
| [name8]  | <input type="radio"/> | <input type="radio"/> | <input type="radio"/> | <input type="radio"/> |
| [name9]  | <input type="radio"/> | <input type="radio"/> | <input type="radio"/> | <input type="radio"/> |
| [name10] | <input type="radio"/> | <input type="radio"/> | <input type="radio"/> | <input type="radio"/> |
| [name11] | <input type="radio"/> | <input type="radio"/> | <input type="radio"/> | <input type="radio"/> |
| [name12] | <input type="radio"/> | <input type="radio"/> | <input type="radio"/> | <input type="radio"/> |
| [name13] | <input type="radio"/> | <input type="radio"/> | <input type="radio"/> | <input type="radio"/> |
| [name14] | <input type="radio"/> | <input type="radio"/> | <input type="radio"/> | <input type="radio"/> |
| [name15] | <input type="radio"/> | <input type="radio"/> | <input type="radio"/> | <input type="radio"/> |

---

**Did your contacts attend all doctor's appointments in the last 3 months? If a person did not have doctor appointments, please select "Not applicable".**

|          | Yes                   | No                    | Don't know            | Not applicable        |
|----------|-----------------------|-----------------------|-----------------------|-----------------------|
| [name1]  | <input type="radio"/> | <input type="radio"/> | <input type="radio"/> | <input type="radio"/> |
| [name2]  | <input type="radio"/> | <input type="radio"/> | <input type="radio"/> | <input type="radio"/> |
| [name3]  | <input type="radio"/> | <input type="radio"/> | <input type="radio"/> | <input type="radio"/> |
| [name4]  | <input type="radio"/> | <input type="radio"/> | <input type="radio"/> | <input type="radio"/> |
| [name5]  | <input type="radio"/> | <input type="radio"/> | <input type="radio"/> | <input type="radio"/> |
| [name6]  | <input type="radio"/> | <input type="radio"/> | <input type="radio"/> | <input type="radio"/> |
| [name7]  | <input type="radio"/> | <input type="radio"/> | <input type="radio"/> | <input type="radio"/> |
| [name8]  | <input type="radio"/> | <input type="radio"/> | <input type="radio"/> | <input type="radio"/> |
| [name9]  | <input type="radio"/> | <input type="radio"/> | <input type="radio"/> | <input type="radio"/> |
| [name10] | <input type="radio"/> | <input type="radio"/> | <input type="radio"/> | <input type="radio"/> |
| [name11] | <input type="radio"/> | <input type="radio"/> | <input type="radio"/> | <input type="radio"/> |
| [name12] | <input type="radio"/> | <input type="radio"/> | <input type="radio"/> | <input type="radio"/> |
| [name13] | <input type="radio"/> | <input type="radio"/> | <input type="radio"/> | <input type="radio"/> |
| [name14] | <input type="radio"/> | <input type="radio"/> | <input type="radio"/> | <input type="radio"/> |
| [name15] | <input type="radio"/> | <input type="radio"/> | <input type="radio"/> | <input type="radio"/> |

---

---

**How far does each person live from you?****For people less than 1 mile, click on 1-5 miles.**

|          | Same house            | 1-5 miles             | 5-15 miles            | 16-50 miles           | 50+ miles             |
|----------|-----------------------|-----------------------|-----------------------|-----------------------|-----------------------|
| [name1]  | <input type="radio"/> | <input type="radio"/> | <input type="radio"/> | <input type="radio"/> | <input type="radio"/> |
| [name2]  | <input type="radio"/> | <input type="radio"/> | <input type="radio"/> | <input type="radio"/> | <input type="radio"/> |
| [name3]  | <input type="radio"/> | <input type="radio"/> | <input type="radio"/> | <input type="radio"/> | <input type="radio"/> |
| [name4]  | <input type="radio"/> | <input type="radio"/> | <input type="radio"/> | <input type="radio"/> | <input type="radio"/> |
| [name5]  | <input type="radio"/> | <input type="radio"/> | <input type="radio"/> | <input type="radio"/> | <input type="radio"/> |
| [name6]  | <input type="radio"/> | <input type="radio"/> | <input type="radio"/> | <input type="radio"/> | <input type="radio"/> |
| [name7]  | <input type="radio"/> | <input type="radio"/> | <input type="radio"/> | <input type="radio"/> | <input type="radio"/> |
| [name8]  | <input type="radio"/> | <input type="radio"/> | <input type="radio"/> | <input type="radio"/> | <input type="radio"/> |
| [name9]  | <input type="radio"/> | <input type="radio"/> | <input type="radio"/> | <input type="radio"/> | <input type="radio"/> |
| [name10] | <input type="radio"/> | <input type="radio"/> | <input type="radio"/> | <input type="radio"/> | <input type="radio"/> |
| [name11] | <input type="radio"/> | <input type="radio"/> | <input type="radio"/> | <input type="radio"/> | <input type="radio"/> |
| [name12] | <input type="radio"/> | <input type="radio"/> | <input type="radio"/> | <input type="radio"/> | <input type="radio"/> |
| [name13] | <input type="radio"/> | <input type="radio"/> | <input type="radio"/> | <input type="radio"/> | <input type="radio"/> |
| [name14] | <input type="radio"/> | <input type="radio"/> | <input type="radio"/> | <input type="radio"/> | <input type="radio"/> |
| [name15] | <input type="radio"/> | <input type="radio"/> | <input type="radio"/> | <input type="radio"/> | <input type="radio"/> |



## Supplementary Methods 2: Equations for Social Network Metrics

$$\text{Size} = N$$

where  $N$  is the number of nodes, not including the ego.

$$\text{Density} = \frac{2L}{N(N-1)}$$

where  $L$  is the number of ties, and  $N$  is the number of nodes, not including the ego.

$$\text{Constraint of } i\text{'s network} = (p_{ij} + \sum_q p_{iq} \times p_{qj})^2$$

where  $i$  is the ego,  $q$  and  $j$  are alters,  $p_{ij}$  is the proportional strength of  $i$ 's relation with  $j$ ,  $p_{iq}$  is the proportional strength of  $i$ 's relation with  $q$ , and  $p_{qj}$  is the proportional strength of  $q$ 's relation with  $j$ .

$$\text{Effective size of } i\text{'s network} = \sum_j \left[ 1 - \sum_q p_{iq} \times m_{jq} \right], q \neq i, j$$

where  $i$  is the ego,  $q$  and  $j$  are alters, and  $\sum_q p_{iq} \times m_{jq}$  measures the portion of  $i$ 's relationship with  $j$  that is redundant to  $i$ 's relationships with other primary contacts.

$$\text{Maximum Degree} = L_{\max}$$

where  $L_{\max}$  is the highest number of ties incident on a single node, not including the ego.

$$\text{Mean Degree} = \frac{L_1 + L_2 + \dots + L_N}{N}$$

where  $L$  is the number of ties from each node and  $N$  is the number of nodes, not including the ego.

## Supplementary Figure 1: Map of Participants' Location

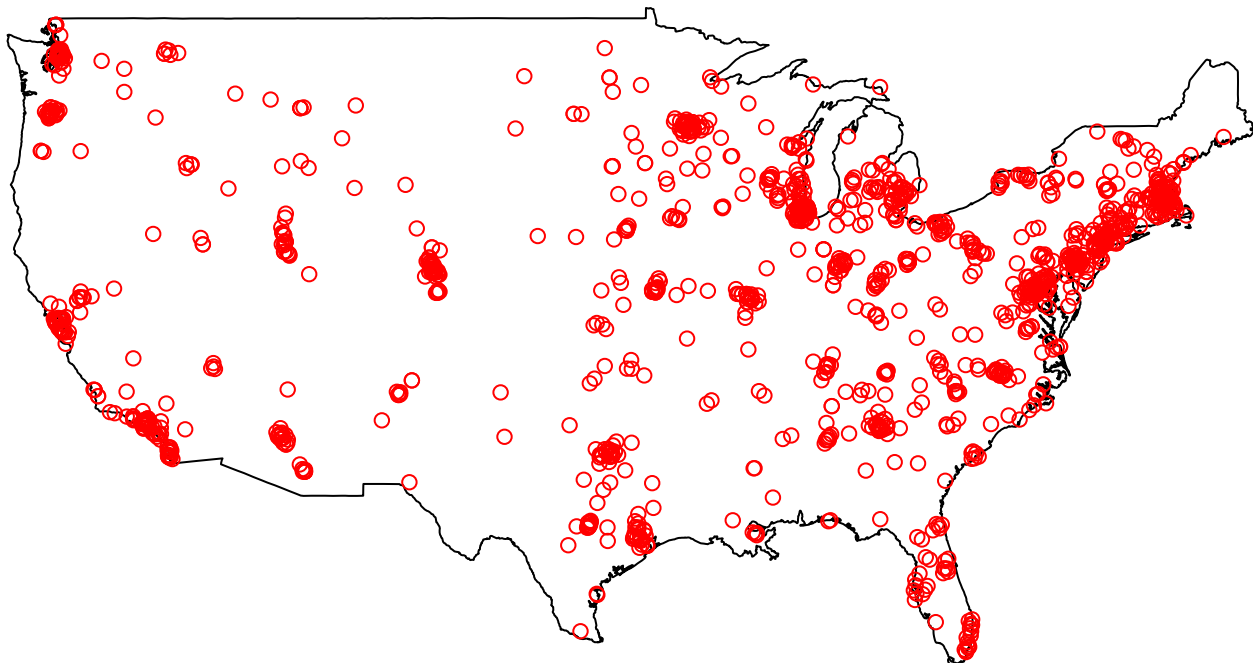

Social networks were examined in 1493 participants of the Genes and Environment in Multiple Sclerosis (GEMS) study across the United States.

Supplementary Table 1: Regression analysis of Genes and Environment Risk Score Components and Network Size

| Variable                         | Beta   | Standard Error | P-value <sup>a</sup> | n    |
|----------------------------------|--------|----------------|----------------------|------|
| <b>All Subjects</b>              |        |                |                      |      |
| Genes and Environment Risk Score | 0.815  | 0.192          | 2.43E-05             | 999  |
| Environmental Risk Score         | 1.24   | 0.333          | 2.00E-04             | 999  |
| Genetic Risk Score               | 0.561  | 0.229          | 0.0146               | 999  |
| Mononucleosis                    | 0.905  | 0.387          | 0.0197               | 1473 |
| Male                             | -1.87  | 0.42           | 8.71E-06             | 1491 |
| Smoking                          | -1.28  | 0.586          | 0.0291               | 1471 |
| <b>Asymptomatic</b>              |        |                |                      |      |
| Genes and Environment Risk Score | 0.916  | 0.197          | 3.76E-06             | 920  |
| Environmental Risk Score         | 1.34   | 0.34           | 9.44E-05             | 920  |
| Genetic Risk Score               | 0.653  | 0.235          | 0.00552              | 920  |
| Mononucleosis                    | 1.13   | 0.4            | 0.00476              | 1364 |
| Male                             | -1.91  | 0.431          | 9.91E-06             | 1376 |
| Smoking                          | -1.53  | 0.601          | 0.0109               | 1363 |
| <b>MS</b>                        |        |                |                      |      |
| Genes and Environment Risk Score | -0.291 | 0.856          | 0.734                | 79   |
| Environmental Risk Score         | 0.227  | 1.42           | 0.873                | 79   |
| Genetic Risk Score               | -0.584 | 1.07           | 0.586                | 79   |
| Mononucleosis                    | -1.64  | 1.51           | 0.277                | 109  |
| Male                             | -1.23  | 1.8            | 0.495                | 115  |
| Smoking                          | 2.29   | 2.51           | 0.363                | 108  |
| <b>Women</b>                     |        |                |                      |      |
| Genes and Environment Risk Score | 0.8    | 0.239          | 8.67E-04             | 814  |
| Environmental Risk Score         | 1.16   | 0.605          | 0.0547               | 814  |
| Genetic Risk Score               | 0.717  | 0.259          | 0.00569              | 814  |
| Mononucleosis                    | 0.941  | 0.439          | 0.0324               | 1190 |
| Male                             | -1.62  | 0.694          | 0.0194               | 1189 |
| <b>Men</b>                       |        |                |                      |      |
| Genes and Environment Risk Score | -0.001 | 0.441          | 0.999                | 185  |
| Environmental Risk Score         | -0.036 | 1.06           | 0.973                | 185  |
| Genetic Risk Score               | 0.006  | 0.471          | 0.99                 | 185  |
| Mononucleosis                    | 0.328  | 0.77           | 0.671                | 283  |
| Male                             | 0.28   | 0.985          | 0.776                | 282  |

<sup>a</sup> Adjusted for age.
