# Supplementary material for: A scalable online tool for quantitative social network assessment reveals potentially modifiable social environmental risks
Source: PubMed Central journal article supplement (PMC6158181; doi:10.1038/s41467-018-06408-6), 2018-09-26
Supplement: 41467_2018_6408_MOESM2_ESM.pdf [file 41467_2018_6408_MOESM2_ESM.pdf]

Reviewers' Comments:

Reviewer #1:

Remarks to the Author:

Review for:

“A Scalable, Web-based, and Quantitative Social Network Assessment for Identifying Potentially Modifiable Risks in the Social Environment”

Amar Dhand, Charles C. White, Catherine Johnson, Zongqi Xia, Philip De Jager

In this paper, the authors present a new quantitative social network assessment tool on a secure open source web platform that could be helpful for large scale clinical studies. They use the tool for demonstration to quantify the social network structure and composition of 1493 persons in US with a risk to develop multiple sclerosis. While network structure measures were not associated with self-reported neurological disabilities, negative health habits of individual's surroundings strongly correlated with the neurological disorder.

There are several limitations of the current study including lack of causal conclusions, self-reporting of both network characteristics and neurological functions and in terms of generalization of the results. On the other hand, the paper is well written, the study technically sounds and the topic is interesting in the broad area of designing interventions and evaluating clinical studies. For those reasons, even if I cannot be very enthusiastic, I believe an improved version could be accepted for publication in Nature Communications. I have some remarks that need to be addressed:

1. Figure 1 (the last part in the right) is not very informative. While the reader understands from the text the separation between the structure and composition, Figure 1 at the right get things complicated.
2. In lines 94-96 the authors state that “the maximum and mean degree ... are indicating the distribution of ties in the network.” Usually social networks are complex in the sense that the degree distribution follows a heterogeneous distribution. Therefore, maximum and mean degree is not conclusive for tie distribution in a network. I propose that the authors change a bit the wording here.
3. Figure 2 is not informative and add nothing to the contribution of the study. It is a very simple scatter plot of the locations of individual participants that gets very complicated in large cities (circles are one over the other) – and it is difficult to fit in a Nature Communication paper. I would have this figure in the supplementary material rather than in the main text. It looks like that the location information is self-reported through an address. Maybe a heat map at the level of county or zip code would look much better. It looks like there is a large correlation between population of a city (or county) and the number of participants. This is something that the authors could report.
4. In line 142 the authors refer to Fig 3. It should be Fig 4. Also in the legend of Fig 4 it refers to “orange” color. I believe the unhealthy friends are red colored.
5. In Figure 3, it looks like that about ~25% of all ego's networks have healthy habits. I think is worth mentioning the exact percentage. Also, is the size of the network correlated (at least weakly) with how “unhealthy” is the network? It should be that the more the friends I have the largest the probability that at least one of them has unhealthy habits. Therefore, the way networks are ranked in Figure 3 is related to the way that networks in Figure 4 are ranked and visualized.
6. My above comment on the correlation between network size and percentage of friends that follow unhealthy habits is the main reason (from my point of view) behind the result that the authors report in Table 3, i.e. the association between the MSRS and the size of the network. There is this confounding here that the structure (at least the size) is highly correlated with the network composition - health. This is something that needs to be discussed in the paper – maybe in page 11.
7. At lines 232-247 the authors discuss about “homophily”. It is a common sense that association (correlation) of health behaviors in a social network can be attributed to homophily (the tendency of similar individuals to connect in a social network) or to contagion effects, or to the fact that

certain areas of a network subject to same externalities. In line 234 the authors state that a "potential mechanism of homophily is social contagion." I would say that potential mechanism of the association in health behaviors are homophily and social contagion.

Reviewer #2:

Remarks to the Author:

This is a very well written and interesting paper that looks at a novel metric that may impact on health. As such it provides new information that may be used to influence the risk of developing MS in those at risk. The social network is certainly a very topical area for research and the authors address this in the GEMS cohort.

I have several questions.

Firstly the MSRS\_R was used as the primary outcome measure of disability but was heavily skewed to a zero response. Did the authors consider using a hurdle model to analyse the data??

What was the influence of educational level on social networks could this be a confounder?

In table 2 it would be useful to provide the actual percentages who smoke etc in addition to the medians IQR.

Could the authors also comment on how representative their sample was of the whole GEMS cohort would it be more likely that those who respond have a greater or lesser social network than those who did not?

The information presented here would definitely allow me to reproduce this work.

Bruce Taylor

University of Tasmania

## *Response to the Referees' Comments*

### Reviewer #1 comments:

In this paper, the authors present a new quantitative social network assessment tool on a secure open source web platform that could be helpful for large scale clinical studies. They use the tool for demonstration to quantify the social network structure and composition of 1493 persons in US with a risk to develop multiple sclerosis. While network structure measures were not associated with self-reported neurological disabilities, negative health habits of individual's surroundings strongly correlated with the neurological disorder.

There are several limitations of the current study including lack of causal conclusions, self-reporting of both network characteristics and neurological functions and in terms of generalization of the results. On the other hand, the paper is well written, the study technically sounds and the topic is interesting in the broad area of designing interventions and evaluating clinical studies. For those reasons, even if I cannot be very enthusiastic, I believe an improved version could be accepted for publication in *Nature Communications*. I have some remarks that need to be addressed:

**1. Figure 1 (the last part in the right) is not very informative. While the reader understands from the text the separation between the structure and composition, Figure 1 at the right get things complicated.**

We have simplified the right side of Figure 1. We have removed two graphs and focused the reader on two modifications possible: adding a new friend or improving the habits of unhealthy social contacts.

**2. In lines 94-96 the authors state that “the maximum and mean degree ... are indicating the distribution of ties in the network.” Usually social networks are complex in the sense that the degree distribution follows a heterogeneous distribution. Therefore, maximum and mean degree is not conclusive for tie distribution in a network. I propose that the authors change a bit the wording here.**

We have removed this wording and changed the sentence as follows:

P.5, line 99: Maximum and mean degree are the network members who have the most number of ties and average number of ties, respectively.

**3. Figure 2 is not informative and add nothing to the contribution of the study. It is a very simple scatter plot of the locations of individual participants that gets very complicated in large cities (circles are one over the other) – and it is difficult to fit in a Nature Communication paper. I would have this figure in the supplementary material rather than in the main text. It looks like that the location information is self-reported through an address. Maybe a heat map at the level of county or zip code would look much better. It looks like there is a large correlation between population of a city (or county) and the number of participants. This is something that the authors could report.**

We have moved the figure to supplementary material. The location of participants is interesting but not directly related to the point of the paper, so we do not add these details into the manuscript. We will consider this variable for future analyses.

**4. In line 142 the authors refer to Fig 3. It should be Fig 4. Also in the legend of Fig 4 it refers to “orange” color. I believe the unhealthy friends are red colored.**

The figure numbers are corrected. The color description is corrected in the legend.

P.28, line 742: Fig 3: A montage of the social network composition of all participants with respect to healthy habits around the participant. Red dots are persons in the network with a negative health influence...

**5. In Figure 3, it looks like that about ~25% of all ego’s networks have healthy habits. I think is worth mentioning the exact percentage. Also, is the size of the network correlated (at least weakly) with how “unhealthy” is the network? It should be that the more the friends I have the largest the probability that at least one of them has unhealthy habits. Therefore, the way networks are ranked in Figure 3 is related to the way that networks in Figure 4 are ranked and visualized.**

We found that 17% of participants had networks in which all persons were healthy. We added this result in the text. There is a weak negative correlation between network size and proportion of unhealthy network members (Pearson’s correlation = -0.13, 95% CI (-0.08 – -0.17)). We added this result to the text.

P.7, line 153: 17% of participants had personal networks in which all members were healthy....There was a weak negative correlation between network size and the percentage of network members with unhealthy habits (Pearson’s correlation = -0.13, 95% confidence interval (-0.08 – -0.17)).

**6. My above comment on the correlation between network size and percentage of friends that follow unhealthy habits is the main reason (from my point of view) behind the result that the authors report in Table 3, i.e. the association between the MSRS and the size of the network. There is this confounding here that the structure (at least the size) is highly correlated with the network composition - health. This is something that needs to be discussed in the paper – maybe in page 11.**

We had the same concern, and addressed it by dividing all compositional trait frequencies by network size to create the percentage variables. Therefore, the percentage of persons who don’t exercise are the number of network members who don’t exercise divided by network size. Therefore, we believe our analyses account for size. We emphasize this on page 5.

P.5, line 110: All compositional variables were created to account for network size. Specifically, the number who fit a category were divided by the total size to create the percentage.

**7. At lines 232-247 the authors discuss about “homophily”. It is a common sense that association (correlation) of health behaviors in a social network can be attributed to homophily (the tendency of similar individuals to connect in a social network) or to contagion effects, or to the fact that certain areas of a network subject to same externalities. In line 234 the authors state that a “potential mechanism of homophily is social contagion.” I would say that potential mechanism of the association in health behaviors are homophily and social contagion.**

We changed this wording throughout the paragraph to not overlap with the prior paragraph that already discusses homophily and instead focus on social contagion and externalities.

P.11, line 256: Two more mechanisms that may explain the association of network members’ health habits and the participant’s neurological disability are social contagion and antecedent exposures. Social contagion is a type of social influence in which behavior in one or many network members affects the behavior of the index participant. Detection of this effect requires longitudinal data and network modeling, such as stochastic actor-oriented or instrumental variable approaches, to understand the spread of behaviors through social ties. For example, one study shows the spread of physical activity in 1 million users of a smartphone running app<sup>31</sup>. Antecedent exposures influencing both parties may be another contributor. For example, rural environments with poor access to medical services may influence the habits of all members of the network with regard to seeking medical care. Finally, a combination of these factors may explain the association of poor health habits in the network and a person’s neurological disability.

Reviewer 2’s comments:

**This is a very well written and interesting paper that looks at a novel metric that may impact on health. As such it provides new information that may be used to influence the risk of developing MS in those at risk. The social network is certainly a very topical area for research and the authors address this in the GEMS cohort.**

**I have several questions.**

**1. Firstly the MSRS\_R was used as the primary outcome measure of disability but was heavily skewed to a zero response. Did the authors consider using a hurdle model to analyze the data?**

We completed a hurdle model with both poisson regression and negative binomial regression to analyze the data. We found they were similar to our non-parametric spearman rank associations (see Supplementary Table 1). The spearman rank associations are robust to non-normal distributions and are easy to interpret. Therefore, after considering all the models, we kept the non-parametric spearman rank associations as the main sensitivity analysis.

**2. What was the influence of educational level on social networks could this be a confounder?**

We agree that years of education could be a confounder. Therefore, we completed additional analyses and revised our linear regression analyses now adjusting for age, sex, marital status, and years of education. The two strongest network composition variables, percent of network members (1) who do not go to the doctor, or (2) are deemed to have a negative health influence on the respondent, remain significant. We modified Table 4 and the text on P.8 to reflect the revised results.

P.8, line 175: To deconstruct these global effects of the social network, we examined the association of individual network metrics with the MSRS-R, adjusting for sex, age, marital status, and years of education (**Table 4**). None of the network structure metrics was significantly associated with MSRS-R score, consistent with the global assessment. Two network composition features were significantly associated with MSRS-R score: the percent of network members who (1) do not go to a doctor regularly, or (2) are deemed to have a negative health influence on the respondent. The strongest association was with the percent of network members who are deemed to have a negative health influence ( $\beta=0.017\pm 0.005$ ,  $p=0.016$ ).

**3. In table 2 it would be useful to provide the actual percentages who smoke etc in addition to the medians IQR.**

This is corrected to show the actual percentages with both a median value and the percentiles for the health habits data.

**4. Could the authors also comment on how representative their sample was of the whole GEMS cohort would it be more likely that those who respond have a greater or lesser social network than those who did not?**

The study population in this manuscript is representative of the overall cohort with respect to demographic profile. In this study, we sent out the social network questionnaire to all participants (as of October 2016) and set a data collection deadline 5 weeks later. We expect the participants who completed the social network questionnaire to be more engaged with the research study than those who did not. However, it is also possible that some participants were simply unavailable to complete the questionnaire during the time frame. It is very difficult to say whether those who completed the questionnaire have a different social network structure or composition than those who did not complete the questionnaire, simply because we do not have data from the latter.

1 August 14, 2018

2 **A Scalable Online Tool for Quantitative Social Network**  
3 **Assessment Reveals Potentially Modifiable Social Environmental**  
4 **Risks**

5 Amar Dhand<sup>1,2,\*</sup>, Charles C. White<sup>3</sup>, Catherine Johnson<sup>4</sup>, Zongqi Xia<sup>5</sup>, Philip De Jager<sup>4</sup>

6

7 <sup>1</sup>Department of Neurology, Brigham and Women's Hospital, Harvard Medical School,  
8 Boston, USA

9 <sup>2</sup>Network Science Institute, Northeastern University, Boston, USA.

10 <sup>3</sup>Broad Institute, Program in Medical and Population Genetics, Cambridge, USA.

11 <sup>4</sup>Multiple Sclerosis Center and the Center for Translational & Computational  
12 Neuroimmunology, Department of Neurology, Columbia University Medical Center,  
13 New York, USA.

14 <sup>5</sup>Department of Neurology, University of Pittsburgh, Pittsburgh, USA.

15

16 To whom correspondence should be addressed:

17 \*Amar Dhand, M.D., D.Phil.

18 Brigham and Women's Hospital

19 75 Francis Street

20 Boston, MA 02115

21 617-732-5330; fax: 61-732-6083; Email: [adhand@bwh.harvard.edu](mailto:adhand@bwh.harvard.edu)

## 22 **ABSTRACT**

23 Social networks are conduits of support, information, and health behavior flows.  
24 Existing measures of social networks used in clinical research are typically summative  
25 scales of social support or artificially truncated networks of  $\leq 5$  people. Here, we  
26 introduce a quantitative social network assessment tool on a secure open-source web  
27 platform, readily deployable in large-scale clinical studies. The tool maps an individual's  
28 personal network including specific persons, their relationships to each other, and their  
29 health habits. To demonstrate utility, we used the tool to measure the social networks of  
30 1493 persons at risk of multiple sclerosis. We examined each person's social network in  
31 relation to self-reported neurological disability. We found that the characteristics of  
32 persons surrounding the participant, such as negative health behaviors, were strongly  
33 associated with the individual's functional disability. This quantitative assessment  
34 reveals key elements of individuals' social environments that could be targeted in  
35 clinical trials.

36

## 37 **INTRODUCTION**

38 Social connectivity is known to impact health. Social isolation is a predictor of  
39 mortality comparable to smoking, hypertension, and physical inactivity<sup>1</sup>. Social  
40 enrichment has a strong positive effect on biological<sup>2</sup> and functional health outcomes<sup>3,4</sup>.  
41 Social connections are also potentially modifiable, making them ideal targets for  
42 changing habits such as smoking, exercise, and diet<sup>5</sup>.

43 Despite their promise in health, social networks are poorly understood in patient  
44 populations and interventions aimed at networks are nascent. One main reason is a lack  
45 of clear definition of the network surrounding a patient<sup>6,7</sup>. Traditional social network



46 metrics are actually summary indices of social support that query the total number of  
47 social contacts, social resources available, and community engagement<sup>8</sup>. Multiple  
48 clinical trials that have used such measures in patient populations have failed to  
49 demonstrate a change in patient outcomes<sup>9-11</sup>. A more precise set of measures are  
50 needed to map the specific people in the social system, one-by-one, and the kind of ties  
51 between persons to clarify the network properties.

52         In this study, we introduce a social network assessment tool that quantifies  
53 patients' personal network structure and health characteristics in a web-based, secure,  
54 and scalable form. The tool is a survey adapted from a validated instrument, the General  
55 Social Survey<sup>12</sup>, and captures the structure of social ties and composition of  
56 demographics and habits around the index patient. We demonstrate the utility of the  
57 tool by quantifying the personal networks of 1493 individuals at-risk for multiple  
58 sclerosis. The participants are enrolled in the Genes and Environment in Multiple  
59 Sclerosis (GEMS) project, a prospective cohort study of people with first-degree family  
60 history of MS<sup>13</sup>. The goal of the GEMS project is to identify novel genetic and  
61 environmental risk factors, including the social environment. Prior work has shown that  
62 asymptomatic MS family members who have a high burden of genetic and  
63 environmental risk factors have evidence of diminished neurologic function<sup>14</sup>. Here, we  
64 show a relationship in the GEMS cohort between social network metrics and  
65 neurological disability. We demonstrate that quantifying social networks in large-scale  
66 clinical studies offers an effective platform to identify previously unknown social  
67 environment risk factors that could be potentially modifiable.

68

69

## 70 **RESULTS**

### 71 **Creating a scalable online tool to assess social networks**

72 We designed a HIPAA-compliant structured social network questionnaire  
73 adapted primarily from the General Social Survey<sup>12,15</sup> (Supplementary **Methods 1**). The  
74 schema of the data acquisition and potential use is presented in **Fig. 1**. The  
75 questionnaire comprises approximately 48 questions with adaptation to responses. The  
76 estimated completion time of the questionnaire is 10-15 minutes. The questionnaire  
77 begins with three traditional name generators, in which participants named all people  
78 with whom they had discussed important matters, socialized, or sought support in the  
79 last 3 months. The number of people who could be named was not capped. Next,  
80 participants answered questions that evaluate the connections between each pair of the  
81 first 10 persons in the network, including the strength of ties in three levels (strangers,  
82 weak, and strong). Finally, participants answered questions about the characteristics  
83 and health habits of each of the first 10 persons in the network<sup>7</sup>. The online  
84 questionnaire was hosted on the Research Electronic Data Capture (REDCap) server, a  
85 secure web platform for administering questionnaires in clinical research<sup>16</sup>. A version of  
86 the instrument is available for use in the REDCap Shared Library. Code to analyze and  
87 visualize data created from the instrument is available on GitHub.

88 The assessment generated two main categories of network metrics, structure and  
89 composition, based on graph theoretical statistics. Within the category of social network  
90 structure, size is the number of individuals in the network, excluding the index  
91 participant, or 'ego'. Density is a measure of connectivity of individuals in the network,  
92 calculated as the sum of ties, excluding the ego's ties, divided by all possible ties<sup>17</sup>.  
93 Constraint is a more detailed version of density that quantifies the extent to which the

94 ego's connections are to individuals who are connected to one another. Effective size is  
95 the number of non-redundant members in the network<sup>18</sup>. Maximum degree is the  
96 highest number of ties by a network member, and mean degree is the average number of  
97 ties by a network member. Equations for these measures are available in Supplementary  
98 **Methods 2**.

99         Within the social network composition category, several metrics quantify the  
100 ratio of member characteristics in the network. For instance, the percent kin is the  
101 percent of individuals in the network who are family members. Standard deviation of  
102 age represents the range of ages. The diversity of sex index is the mix of men and women  
103 in the network, according to the index of qualitative variation<sup>19</sup>, with a value of 1  
104 indicating equal mix of men and women. The diversity of race is the mix of races  
105 similarly calculated. Importantly, the questionnaire also queries the health behavior  
106 environment around the participant by examining the percentage of the network  
107 members with negative health habits, including smoking, sedentary lifestyle, not visiting  
108 doctors regularly, and poor compliance of prescription medications. All compositional  
109 variables were created to account for network size. Specifically, the number who fit a category  
110 were divided by the total size to create the percentage.

111

## 112 **Demonstrating network quantification in a nation-wide cohort**

113         We assessed the social networks of 1493 GEMS participants from across the  
114 United States (Supplementary **Fig. 1**), which represented 57% of the cohort as of  
115 October 2016. In **Table 1**, we report the demographic and clinical information of the  
116 cohort at the time of the study, separated into subgroups of asymptomatic participants  
117 and participants with an MS diagnosis. Asymptomatic participants had a lower age on

118 average than participants with an MS diagnosis, consistent with the previously reported  
119 demographics of the cohort<sup>13</sup>.

120 The primary outcome measure of functional disability was the MSRS-R, a self-  
121 reported outcome of functional disability validated for people with MS. The MSRS-R is a  
122 brief questionnaire that correlates with traditional clinical instruments<sup>20,21</sup>. The eight  
123 domains of MSRS-R include walking, using arms and hands, vision, speaking clearly,  
124 swallowing, cognition, sensation, and bowel and bladder function, for a maximum score  
125 of 32. In this cohort of primarily asymptomatic people at risk for MS, we chose MSRS-R  
126 as an outcome measure because few alternative self-reported outcome measures have  
127 the advantages of being concise and validated in early MS. As expected, the median  
128 MSRS-R score was higher on average in the MS group than in the asymptomatic group.

129 To visualize each participant's social network structure, we plotted a montage of  
130 all participants' networks, ranging from the smallest to the largest, with the strength of  
131 each tie highlighted in color (**Fig 2**). The average network consisted of 8 people who  
132 were densely linked (67% of all possible ties were present). Furthermore, an average  
133 44% of all network members were kin, 38% were supportive of the index participant,  
134 and there was a nearly equal mix of men and women (diversity score of 0.89 with 1  
135 being an equal mixture of men and women). Race, on the other hand, was not varied  
136 within networks with a diversity score of 0, indicating that most members in a  
137 participant's network were of the same race. Weak ties, denoting those who are less  
138 familiar with the participant, ranged from 20% to 67% depending on the measure. The  
139 percent of individuals who were known for less than 6 years by the respondent was 20%  
140 in asymptomatic persons and 12% in MS patients ( $p=0.001$ , Wilcoxon signed rank test),  
141 suggesting a reduction in recent acquaintances in participants with a MS diagnosis.

142 Otherwise, differences in network structure and general network composition between  
143 asymptomatic and MS participants were small and not significant (**Table 2**).

144 To visualize the milieu of health habits around the participant, we plotted a  
145 montage of all participants' networks, ranging from the healthiest environment to the  
146 least healthy (**Fig 3**). On average, the network composition with respect to health habits  
147 skewed towards social environments in which most network members have healthy  
148 habits. 17% of participants had personal networks in which all members were healthy.  
149 On average, the percent of network members who do not exercise was 33%, and this was  
150 the highest value out of the examined negative health habits. There was a weak negative  
151 correlation between network size and the percentage of network members with  
152 unhealthy habits (Pearson's correlation =  $-0.13 \pm 0.05$ ,  $p < 0.0001$ ). Because we did not  
153 detect differences in network composition with respect to healthy habits between  
154 asymptomatic and MS participants, we were able to pursue joint analyses of these two  
155 subgroups.

156 Having established the basic properties of our data, we examined the relationship  
157 between network metrics and self-reported functional disability outcome. Given the  
158 number of network metrics and to account for multiple testing burdens, we grouped the  
159 network variables into structure and composition categories. We then used a  
160 permutation based omnibus test to examine associations of these two groups of network  
161 metrics with the MSRS-R. The observed distribution of P-values in the omnibus test was  
162 greater than chance for network composition ( $p < 0.0001$  all;  $p = 0.008$  asymptomatic  
163 subgroup;  $p = 0.001$  MS subgroup), but not for network structure ( $p = 0.066$  all;  $p = 0.14$   
164 asymptomatic subgroup;  $p = 0.25$  MS subgroup) (**Table 3, Fig 4**). Thus, our global  
165 assessments indicated that network composition, rather than network structure, was

166 associated with self-reported functional disability based on the MSRS-R scores (**Table**  
167 **3**).

168 To deconstruct these global effects of the social network, we examined the  
169 association of individual network metrics with the MSRS-R, adjusting for sex, age,  
170 marital status, and years of education (**Table 4**). None of the network structure metrics  
171 was significantly associated with MSRS-R score, consistent with the global assessment.  
172 Two network composition features were significantly associated with MSRS-R score: the  
173 percent of network members who (1) do not go to a doctor regularly, or (2) are deemed  
174 to have a negative health influence on the respondent. The strongest association was  
175 with the percent of network members who are deemed to have a negative health  
176 influence ( $\beta=0.017\pm0.005$ ,  $p=0.016$ , linear regression).

177 In exploratory analyses, we examined the relationship between each individual's  
178 Genetic & Environmental Risk Score (GERS) and her or his social network size. The  
179 GERS is an aggregate estimate of an individual's MS risk based on validated genetic and  
180 environmental susceptibility factors. We have previously reported that the GERS is  
181 informative of MS risk beyond family history in the GEMS cohort of first-degree family  
182 members.<sup>13</sup> Using the published GERS based on previously reported genetic and  
183 environmental risk factor data available among a subset of the GEMS participants  
184 ( $n=999$  all,  $n=920$  asymptomatic subgroup,  $n=79$  MS subgroup), we noted an  
185 association in linear regression between larger network size and increased GERS  
186 ( $\beta=0.82\pm0.19$ ,  $p=2.43\times10^{-5}$ , all) (Supplementary **Table 1**). This finding appears to be  
187 driven by the larger network size of women participants relative to men. In a regression  
188 analysis, network size is inversely related to male sex ( $\beta=-1.87\pm0.42$ ,  $p=8.71\times10^{-6}$ ,  
189 all). Among asymptomatic participants, both a history of mononucleosis

190 (beta=1.13±0.40, p=0.005) and a higher genetic risk score for MS susceptibility  
191 (beta=0.65±0.24, p=0.006) were also associated with a larger network size in the linear  
192 regression (Supplementary **Table 1**).

193

## 194 **DISCUSSION**

195 In this in-depth analysis of social networks in a clinical population, we  
196 demonstrate the ease and utility of deploying our online questionnaire that evaluates an  
197 individual's social network in a structured manner. In a few weeks and using only  
198 electronic communication, we collected complete data on 1493 individual GEMS  
199 participants. This large data set allowed us to pursue analyses in a statistically robust  
200 manner and to produce highly significant results. These results represent an important  
201 milestone in studies of MS and other neurologic conditions with a long prodromal  
202 neurodegenerative phase: it provides investigators with the key data needed to support  
203 power calculations and guide future study designs. In particular, we found that  
204 asymptomatic family members at risk of MS have enough variance in our measure of  
205 self-reported disability to yield strong association results with compositional but not  
206 structural variables. Most prominently, the health habits of persons in their social  
207 environment was strongly associated with the participant's self-reported neurological  
208 dysfunction, and the percent of network members who have a negative health influence  
209 had the strongest association with disability. While these results need to be validated,  
210 they show (1) that studies of "at risk" individuals in which overt symptoms of a  
211 neurologic disease have not yet become manifest are feasible and (2) that network  
212 composition is an area that deserves further dissection in individuals at risk for MS and  
213 perhaps for other neurodegenerative diseases.

214 Our assessment adds to a growing list of web-based personal network surveys  
215 that translate the complexity and burdensome features of this type of questionnaire into  
216 a more usable and scalable form<sup>22</sup>. Two examples in public health include EgoWeb  
217 2.0<sup>23</sup>, an open source software that may be used for motivational interviewing using  
218 network graphics, and OpenEddi<sup>24</sup>, a tool designed for interactive, tablet or mobile-  
219 ready field collection of network data. Our tool is unique in that it is a HIPAA-compliant  
220 data collection tool, able to be completed by patients without an interviewer, and has the  
221 capability to handle large volumes of data from clinical populations using electronic  
222 communications. The assessment also included questions customized for patients or at-  
223 risk individuals with a focus on social support and health-related behaviors of network  
224 members. These dimensions are critical for future planning of network interventions to  
225 improve health and quality-of-life outcomes in clinical settings.

226 One mechanism that may explain some of our findings is the tendency of  
227 individuals to associate with others who are similar to themselves, or homophily.  
228 Similarity breeding social connection has been described in other social network  
229 studies<sup>25</sup>. Race and ethnicity are the strongest linkage factors leading to homogenous  
230 personal environments<sup>25</sup>, and we found this in our study as well. However, there are  
231 many examples of health behavior homophily. Children's social network composition is  
232 significantly associated with several aspects of children's own health<sup>26</sup>. Latrine  
233 ownership in rural India is correlated with latrine usage among social contacts, after  
234 control of caste, education, and income<sup>27</sup>. An individual's weight is influenced by obesity  
235 of spouses and same-sex social contacts<sup>28</sup>, and incident type 2 diabetes is associated  
236 with obesity in spouses<sup>29</sup>. Aspirin use is correlated with aspirin use among friends and  
237 family<sup>30</sup>. Taken together, these findings point to core human behaviors that are shared



238 among like-minded social contacts, with eating and physical activity as major driving  
239 forces for these effects.

240         Two more mechanisms that may explain the association of network members'  
241 health habits and the participant's neurological disability are social contagion and  
242 antecedent exposures. Social contagion is a type of social influence in which behavior in  
243 one or many network members affects the behavior of the index participant. Detection  
244 of this effect requires longitudinal data and network modeling, such as stochastic actor-  
245 oriented or instrumental variable approaches, to understand the spread of behaviors  
246 through social ties. For example, one study shows the spread of physical activity in 1  
247 million users of a smartphone running app<sup>31</sup>. Antecedent exposures influencing both  
248 parties may be another contributor. For example, rural environments with poor access  
249 to medical services may influence the habits of all members of the network with regard  
250 to seeking medical care. Finally, a combination of these factors may explain the  
251 association of poor health habits in the network and a person's neurological disability.

252         The association between an individual's susceptibility for MS, as determined by  
253 GERS, and social network size is a preliminary finding that requires further  
254 investigation. This may be explained by the inclusion of sex as a component of GERS<sup>13</sup>  
255 and prior observation that women tend to have larger social networks<sup>15</sup>. However, the  
256 imbalance of men (19%) and women (81%) in this study potentially complicates the  
257 interpretation. Another explanation is that larger network size reflects broader exposure  
258 to infectious agents that are associated with MS susceptibility, such as history of  
259 infectious mononucleosis<sup>13</sup>. Indeed, we observed a positive association between  
260 mononucleosis and network size among asymptomatic participants. Finally, the role of

261 genetic factors in network size is provocative, but the effect is modest and needs further  
262 investigation.

263         Our study has limitations. First, we were unable to establish causality and  
264 directionality of the associations or the mechanisms of homophily in this cross-sectional  
265 study. Within the GEMS platform, we are gathering longitudinal social network data.  
266 Second, the primary outcome measure of neurological disability (MSRS-R) was skewed  
267 towards low scores due to the larger proportion of self-reported asymptomatic  
268 participants in the GEMS cohort who have low scores in this instrument. This could  
269 reduce the precision of our analyses due to a floor effect. Further, the study may be  
270 underpowered to compare asymptomatic and MS subgroups given the modest number  
271 of the MS cases (i.e. familial MS). Larger studies of individuals with sporadic MS will  
272 better answer whether social network variables influence disease worsening in MS.  
273 Third, unmeasured confounders that influence report of social networks and functional  
274 disability could have affected our findings. We attempted to address this limitation by  
275 adjusting for major factors reported in the literature, including age, sex, and marital  
276 status. Fourth, we ascertained social network metrics based on participants' self-report  
277 of their social networks. While this approach may introduce unknown biases, prior work  
278 reassuringly had shown self-reported personal networks of intimate contacts to be  
279 accurate<sup>32</sup>. Finally, this study of the GEMS participants who were recruited through  
280 advocacy groups, social media, and electronic communications, may not have broad  
281 generalizability, because these participants are more socially engaged and better  
282 educated than the general population. Future studies of more diverse populations and  
283 other chronic neurological disorders will be critical.

284           The social environment is ubiquitous and important for understanding human  
285 disease etiologies and outcomes. Social network features, in general, represent an  
286 emerging group of metrics that inform aspects of health and disease, but are not  
287 currently well captured by many biomedical research studies. We outline an approach of  
288 quantitative social network analysis that is readily adaptable in clinical investigations.  
289 The questionnaire that we have developed for quantifying social networks is available  
290 through the open-source REDCap platform. In the empirical work described, we found  
291 that the health behaviors of persons surrounding an individual at-risk for MS were  
292 associated with the individual's own functional status. These results suggest that  
293 interventions aimed at modulating network composition through education or  
294 treatment of members in a social network holds the promise of a novel complementary  
295 approach to managing MS onset and disease course.

296

## 297 **METHODS**

### 298 **Study design and participants.**

299           In a cross-sectional design, we invited GEMS participants to complete an online  
300 questionnaire assessing social networks and current neurological disability in October  
301 2016 (Supplementary **Methods 1**). The questionnaire was live for 6 weeks, with  
302 reminders sent to non-responders. At the time, the GEMS cohort included 2,632 first-  
303 degree family members from across the United States, recruited using patient advocacy  
304 groups, social media, and word of mouth<sup>13</sup>. The inclusion criteria were: being 18 to 50  
305 years of age at enrollment, and having at least one first-degree relative with a diagnosis  
306 of MS (e.g., parent, full-sibling, or child). While asymptomatic family members who are  
307 at risk for MS represent the main focus of the GEMS project, we also recruited family

308 members who already have a MS diagnosis for comparison in this cross-sectional study.  
309 MS cases were confirmed by review of medical records. The institutional review boards  
310 of all participating sites (Partners HealthCare, National Institutes of Health, and  
311 University of Pittsburgh) approved the study. All participants provided written informed  
312 consent.

313

#### 314 **Statistical methods.**

315 To compare demographic characteristics between asymptomatic participants and  
316 confirmed MS cases, we performed a t-test for age, chi-squared tests for dichotomous  
317 variables of sex, marital status, and living alone, as well as non-parametric Wilcoxon  
318 rank-sum tests for years of education and MSRS-R. Similarly, we performed non-  
319 parametric Wilcoxon rank-sum tests to compare network metrics between  
320 asymptomatic participants and participants with MS diagnosis.

321 To assess the association with MSRS-R score, we performed a linear regression  
322 for each network variable, adjusting for age, sex, and marital status. In this analysis,  
323 MSRS-R was modeled as the dependent variable, and each network characteristic as the  
324 independent variable. Within each network metrics category (structure and  
325 composition), we calculated the false discovery rate to adjust for multiple testing. To  
326 examine any potential bias due to non-normal distributions, we performed a sensitivity  
327 analysis applying non-parametric spearman correlation tests.

328 To examine the hypothesis that as a category, social network variables were  
329 associated with the MSRS-R score, we performed an empirical omnibus test. In the first  
330 stage of this analysis, we calculated the p-values of association between each network  
331 variable and MSRS-R score using linear regression as described above. In the second

332 stage, we used a Fisher's meta-analysis to combine these p-values and calculate a chi-  
333 squared statistic. We then compared this chi-square statistic to an empirical distribution  
334 of chi-squared statistics as generated by 10,000 random permutations. By permuting  
335 the MSRS-R score, we maintained the correlation structure of the network variables.  
336 The empirical omnibus p-value was then calculated as the number of times that the chi-  
337 squared statistic from the 10,000 permutations was greater than the true chi-squared  
338 statistic, divided by the total number of permutations. To generate a quantile-quantile  
339 plot, we plotted the observed  $-\log_{10}(\text{p-value})$  of each pair of association between a  
340 network variable and MSRS-R score against the expected  $-\log_{10}(\text{p-value})$ . The 90th and  
341 95th empirical confidence intervals were determined using empirical p-values as  
342 generated by the 10,000 permutations. We performed the omnibus test in all  
343 participants as well as in the subset of asymptomatic participants and the subset of  
344 participants with MS diagnosis.

345 In exploratory analyses, we assessed the relationship of GERS (a published  
346 estimate of MS risk based on an individual's known genetic burden and environmental  
347 exposures for MS susceptibility) and social network metrics. Here, we performed linear  
348 regressions, adjusting for age, modeling network size as the dependent variable, and the  
349 GERS (and its components: history of infectious mononucleosis, sex, smoking status;  
350 environmental risk score; genetic risk score) as the independent variables. All analyses  
351 were performed in R version 3.2<sup>33</sup>. All statistical tests were two-sided. Given the  
352 exploratory nature of the analysis and data, power calculations were not performed  
353 prior to analysis. Permutations and nonparametric tests were used to avoid bias due to  
354 any non-normal data or unequal variances between groups, as necessary.

355

356 **Code availability.**

357 An updated version of the instrument called “Personal Network Survey for Clinical  
358 Research” is available in the REDCap Shared Library. We have also uploaded a  
359 comprehensive R codebase for researchers who use the instrument to analyze and  
360 visualize their data available at: <https://github.com/AmarDhand/PersonalNetworks>. R  
361 code used specifically for this project can be made available upon request.

362

363 **Data availability.**

364 The data used in this study is freely available as a supplement to this manuscript  
365 (Supplementary **Database 1**).

366

367 **ACKNOWLEDGEMENTS**

368 This work was supported by NIH grants K23HD083489, Ko8NS079493, and National  
369 Multiple Sclerosis Society RG-5003-A-2. We acknowledge Angela H. Kim for developing  
370 figures.

371

372 **AUTHOR CONTRIBUTIONS**

373 A.D., C.W., Z.X., and P.L.D conceived the study. A.D., C.W., and C.J. collected the data.  
374 A.D., C.W. Z.X., C.J., and P.L.D performed data analysis. A.D., C.W. Z.X., C.J., and  
375 P.L.D wrote the manuscript.

376

377 **ADDITIONAL INFORMATION**

378 **Supplementary information** is available in the online version of the paper.

379 **Completing interests.** The authors have declared that no conflict of interest exists.

380

381 **REFERENCES**

- 382 1. Holt-Lunstad, J., Smith, T. B. & Layton, J. B. Social relationships and mortality  
383 risk: a meta-analytic review. *Plos Med.* **7**, e1000316 (2010).
- 384 2. Yang, Y. C. *et al.* Social relationships and physiological determinants of longevity  
385 across the human life span. *Proc. Natl. Acad. Sci. USA* **113**, 578–583 (2016).
- 386 3. Fratiglioni, L., Wang, H. X., Ericsson, K., Maytan, M. & Winblad, B. Influence of  
387 social network on occurrence of dementia: a community-based longitudinal study.  
388 *Lancet.* **355**, 1315–1319 (2000).
- 389 4. Glass, T. A., Matchar, D. B., Belyea, M. & Feussner, J. R. Impact of social support  
390 on outcome in first stroke. *Stroke.* **24**, 64–70 (1993).
- 391 5. Valente, T. W. *Social Networks and Health.* (Oxford University Press, New York,  
392 2010).
- 393 6. Legg, L. A. *et al.* Non-pharmacological interventions for caregivers of stroke  
394 survivors. *Cochrane Database Syst. Rev.* CD008179 (2011).
- 395 7. Dhand, A., Luke, D. A., Lang, C. E. & Lee, J. M. Social networks and neurological  
396 illness. *Nat. Rev. Neurol.* **12**, 605–612 (2016).
- 397 8. Smith, K. P. & Christakis, N. A. Social networks and health. *Annu. Rev. Sociol.* **34**,  
398 405–429 (2008).
- 399 9. Glass, T. A. *et al.* The Families In Recovery From Stroke Trial (FIRST): primary  
400 study results. *Psychosom. Med.* **66**, 889–897 (2004).
- 401 10. Berkman, L. F. *et al.* Effects of treating depression and low perceived social  
402 support on clinical events after myocardial infarction: the Enhancing Recovery in  
403 Coronary Heart Disease Patients (ENRICHD) Randomized Trial. *JAMA.* **289**,

- 404 3106–3116 (2003).
- 405 11. Forster, A. *et al.* A structured training programme for caregivers of inpatients  
406 after stroke (TRACS): a cluster randomised controlled trial and cost-effectiveness  
407 analysis. *Lancet*. **382**, 2069–2076 (2013).
- 408 12. Burt, R. S. Network items and the general social survey. *Social Networks*. **6**, 293–  
409 339 (1984).
- 410 13. Xia, Z. *et al.* Genes and Environment in Multiple Sclerosis project: A platform to  
411 investigate multiple sclerosis risk. *Ann. Neurol*. **79**, 178–189 (2016).
- 412 14. Xia, Z. *et al.* Assessment of Early Evidence of Multiple Sclerosis in a Prospective  
413 Study of Asymptomatic High-Risk Family Members. *JAMA Neurol*. **74**, 293–300  
414 (2017).
- 415 15. O’Malley, A. J., Arbesman, S., Steiger, D. M., Fowler, J. H. & Christakis, N. A.  
416 Egocentric social network structure, health, and pro-social behaviors in a national  
417 panel study of Americans. *PLoS ONE*. **7**, e36250 (2012).
- 418 16. Harris, P. A. *et al.* Research electronic data capture (REDCap)--a metadata-driven  
419 methodology and workflow process for providing translational research  
420 informatics support. *J. Biomed. Inform.* **42**, 377–381 (2009).
- 421 17. Wasserman, S. & Faust, K. *Social Network Analysis*. (Cambridge University  
422 Press, Cambridge, 2009).
- 423 18. Burt, R. S. Structural Holes and Good Ideas. *American Journal of Sociology*. **110**,  
424 349–399 (2004).
- 425 19. Agresti, A. & Agresti, B. F. Statistical Analysis of Qualitative Variation.  
426 *Sociological Methodology*. **9**, 204–237 (1978).
- 427 20. Wicks, P., Vaughan, T. E. & Massagli, M. P. The multiple sclerosis rating scale,



- 428 revised (MSRS-R): development, refinement, and psychometric validation using  
 429 an online community. *Health Qual. Life Outcomes*. **10**, 70 (2012).
- 430 21. Bove, R. *et al.* Complex relation of HLA-DRB1\*1501, age at menarche, and age at  
 431 multiple sclerosis onset. *Neurol. Genet.* **2**, e88 (2016).
- 432 22. Vehovar, V., Lozar Manfreda, K., Koren, G. & Hlebec, V. Measuring ego-centered  
 433 social networks on the web: Questionnaire design issues. *Social Networks*. **30**,  
 434 213–222 (2008).
- 435 23. Kennedy, D. P. *et al.* A computer-assisted motivational social network  
 436 intervention to reduce alcohol, drug and HIV risk behaviors among Housing First  
 437 residents. *Addict. Sci. Clin. Pract.* **11**, 4–17 (2016).
- 438 24. Eddens, K. S., Fagan, J. M. & Collins, T. An Interactive, Mobile-Based Tool for  
 439 Personal Social Network Data Collection and Visualization Among a  
 440 Geographically Isolated and Socioeconomically Disadvantaged Population: Early-  
 441 Stage Feasibility Study With Qualitative User Feedback. *JMIR Res. Protoc.* **6**,  
 442 e124–17 (2017).
- 443 25. McPherson, M., Smith-Lovin, L. & Cook, J. M. Birds of a Feather: Homophily in  
 444 Social Networks. *Annu. Rev. Sociol.* **27**, 415–444 (2001).
- 445 26. Kennedy-Hendricks, A. *et al.* Health implications of social networks for children  
 446 living in public housing. *Health Place*. **36**, 145–151 (2015).
- 447 27. Shakya, H. B., Christakis, N. A. & Fowler, J. H. Social network predictors of latrine  
 448 ownership. *Soc. Sci. Med.* **125**, 129–138 (2015).
- 449 28. Christakis, N. A. & Fowler, J. H. The spread of obesity in a large social network  
 450 over 32 years. *N. Engl. J. Med.* **357**, 370–379 (2007).
- 451 29. Raghavan, S. *et al.* Incident Type 2 Diabetes Risk is Influenced by Obesity and

- 452 Diabetes in Social Contacts: a Social Network Analysis. *J. Gen. Intern. Med.* **31**, 1–  
453 7 (2016).
- 454 30. Strully, K. W. *et al.* Aspirin use and cardiovascular events in social networks. *Soc.*  
455 *Sci. Med.* **74**, 1125–1129 (2012).
- 456 31. Aral, S. & Nicolaides, C. Exercise contagion in a global social network. *Nat.*  
457 *Commun.* **8**, 14753 (2017).
- 458 32. Green, H. D., Hoover, M. A., Wagner, G. J., Ryan, G. W. & Ssegujja, E. Measuring  
459 Agreement between Egos and Alters: Understanding Informant Accuracy in  
460 Personal Network Studies. *Field Methods* **26**, 126–140 (2013).
- 461 33. R Core Team. R: A language and environment for statistical computing. (2016).  
462

463 **TABLES**

464

**Table 1: Demographics and Clinical Characteristics of the Participants**

| Characteristic                         | Asymptomatic<br>n=1378 | MS<br>n=115        | P-value <sup>a</sup> |
|----------------------------------------|------------------------|--------------------|----------------------|
| Age, mean (SD), y                      | 37.85 (8.34)           | 43.14 (7.60)       | <0.001               |
| Male sex, No. (%)                      | 269 (19.5)             | 19 (16.5)          | 0.51                 |
| Years of education, median [IQR]       | 16 [16, 18]            | 16 [15, 18]        | 0.18                 |
| Married, No. (%)                       | 914 (66.7)             | 86 (76.1)          | 0.051                |
| Living alone, No. (%)                  | 198 (13.4)             | 12 (10.4)          | 0.45                 |
| Age of onset of MS symptoms, mean (sd) | NA                     | 30.50 (8.70)       | NA                   |
| Age of diagnosis of MS, mean (sd)      | NA                     | 34.36 (7.74)       | NA                   |
| MSRS-R, median [IQR]                   | 1.00 [1.00, 2.00]      | 7.00 [3.00, 11.00] | <0.001               |

465 <sup>a</sup> P values calculated using t-test for age; chi-squared test for female sex, married, and living  
466 alone; and Wilcoxon signed rank test for years of education and MS rating scale score-Revised  
467 (MSRS-R).

468

469

**Table 2: Network Characteristics**

| Characteristic                                                                  | Asymptomatic<br>n=1378     | MS<br>n=115                | P-value <sup>a</sup> |
|---------------------------------------------------------------------------------|----------------------------|----------------------------|----------------------|
| <i>Network Structure<sup>b</sup></i>                                            |                            |                            |                      |
| Size, median [IQR]                                                              | 8.00 [6.00, 12.00]         | 8.00 [5.00, 11.50]         | 0.130                |
| Density, median [IQR]                                                           | 67.00 [50.00, 89.00]       | 69.00 [53.00, 90.00]       | 0.170                |
| Constraint, median [IQR]                                                        | 44.00 [37.72, 53.03]       | 44.71 [38.19, 56.17]       | 0.315                |
| Effective Size, median [IQR]                                                    | 4.00 [2.80, 5.25]          | 3.55 [2.50, 5.07]          | 0.053                |
| Maximum Degree, median<br>[IQR]                                                 | 5.00 [4.00, 7.00]          | 5.00 [4.00, 8.00]          | 0.987                |
| Mean Degree, median [IQR]                                                       | 4.00 [2.80, 5.00]          | 4.00 [2.50, 5.40]          | 0.493                |
| <i>Network Composition—</i>                                                     |                            |                            |                      |
| <i>General<sup>c</sup></i>                                                      |                            |                            |                      |
| Percent kin, median [IQR]                                                       | 43 [30, 62]                | 50 [33, 67]                | 0.205                |
| Percent who are supportive,<br>median [IQR]                                     | 38 [25, 50]                | 40 [21, 50]                | 0.561                |
| Standard deviation of age,<br>median [IQR]                                      | 12.76 [10.04, 15.38]       | 12.98 [10.54, 16.89]       | 0.161                |
| Diversity of sex, median<br>[IQR]                                               | 0.89 [0.64, 0.96]          | 0.82 [0.64, 0.96]          | 0.108                |
| Diversity of race, median,<br>Percentile<br>{90th,95th,99th,100th} <sup>d</sup> | 0<br>{0.44,0.55,0.72,1.20} | 0<br>{0.41,0.59,0.77,0.77} | 0.046                |
| Percent contacted weekly or<br>less often, median [IQR]                         | 67 [50, 80]                | 67 [45, 80]                | 0.896                |

|                                                                                            |                     |                     |       |
|--------------------------------------------------------------------------------------------|---------------------|---------------------|-------|
| Percent who have been known for less than 6 years, median [IQR]                            | 20 [0, 43]          | 12 [0, 33]          | 0.001 |
| Percent who live more than 15 miles away, median [IQR]                                     | 33 [17, 50]         | 33 [20, 56]         | 0.514 |
| <i>Network Composition–Health Habits<sup>a</sup></i>                                       |                     |                     |       |
| Percent who smoke, median [IQR]                                                            | 0 [0, 20]           | 0 [0, 40]           | 0.164 |
| Percent who do not exercise, median [IQR]                                                  | 33 [14, 54]         | 25 [10, 50]         | 0.068 |
| Percent who do not take medications regularly, median, Percentile {90th,95th,99th,100th}   | 0 {0, 14, 33, 100}  | 0 {0, 17, 24, 50}   | 0.709 |
| Percent who do not go to doctor’s appointments, median, Percentile {90th,95th,99th,100th}  | 0 {0, 12, 25, 100}  | 0 {0, 15, 48, 100}  | 0.314 |
| Percent who have a negative influence on health, median, Percentile {90th,95th,99th,100th} | 0 {29, 46, 71, 100} | 0 {20, 33, 78, 100} | 0.150 |

---

470 <sup>a</sup> P-values calculated using Wilcoxon signed rank test.

471 <sup>b</sup> Network structure is quantified into graph theoretic statistics. See definitions in Methods.

472 <sup>c</sup> Network composition–General is the range of characteristics of people around the participant.

473 See definitions in Methods.

474 <sup>d</sup> Percentile are used to better understand the right-skewed distribution of the variables of race

475 and certain health habits .

476 <sup>e</sup> Network composition–Health Behavior is the range of health habits of people around the

477 participant.

478

**Table 3: Relationship of the Composite Categories of Network Variables to MSRS in all participants**

| Variable Category | Number of Variables | Top variable                                   | Top variable P-value | Top variable FDR <sup>a</sup> value | Composite P-value <sup>b</sup> |
|-------------------|---------------------|------------------------------------------------|----------------------|-------------------------------------|--------------------------------|
| Structure         | 6                   | Total Size                                     | 0.025                | 0.133                               | 0.066                          |
| Composition       | 13                  | Percent who do not go to doctor's appointments | $7.4 \times 10^{-8}$ | $9.6 \times 10^{-7}$                | <0.0001                        |

479 <sup>a</sup> FDR, False discovery rate

480 <sup>b</sup> Permutation based omnibus test is described in the methods.

481

482

**Table 4: Relationship of Individual Network Variables to MSRS-R**

| Variable                                          | Beta   | Standard Error | Adjusted P-value <sup>a</sup> | FDR <sup>b</sup> |
|---------------------------------------------------|--------|----------------|-------------------------------|------------------|
| <i>Network Structure</i>                          |        |                |                               |                  |
| Size                                              | -0.025 | 0.013          | 0.052                         | 0.197            |
| Density                                           | 0.007  | 0.365          | 0.985                         | 0.985            |
| Constraint                                        | 0.004  | 0.007          | 0.537                         | 0.729            |
| Effective Size                                    | -0.035 | 0.05           | 0.487                         | 0.712            |
| Maximum Degree                                    | -0.041 | 0.044          | 0.347                         | 0.564            |
| Mean Degree                                       | 0.003  | 0.052          | 0.958                         | 0.985            |
| <i>Network Composition—General</i>                |        |                |                               |                  |
| Percent kin                                       | 0.001  | 0.004          | 0.769                         | 0.876            |
| Percent who are supportive                        | -0.005 | 0.004          | 0.198                         | 0.47             |
| Standard deviation of age                         | -0.006 | 0.017          | 0.701                         | 0.876            |
| Diversity of sex                                  | -0.332 | 0.359          | 0.356                         | 0.564            |
| Diversity of race                                 | 0.686  | 0.423          | 0.105                         | 0.333            |
| Percent contacted weekly or less often            | -0.009 | 0.004          | 0.023                         | 0.147            |
| Percent who have been known for less than 6 years | 0.001  | 0.004          | 0.784                         | 0.876            |
| Percent who live more than 15 miles away          | -0.003 | 0.004          | 0.346                         | 0.564            |
| <i>Network Composition—Health</i>                 |        |                |                               |                  |
| Percent who smoke                                 | 0.006  | 0.003          | 0.045                         | 0.197            |
| Percent who do not exercise                       | -0.003 | 0.003          | 0.296                         | 0.564            |
| Percent who do not take medications               | 0.018  | 0.012          | 0.123                         | 0.334            |



regularly

Percent who do not go to doctor's

|              |       |       |       |       |
|--------------|-------|-------|-------|-------|
| appointments | 0.045 | 0.015 | 0.002 | 0.023 |
|--------------|-------|-------|-------|-------|

Percent who have a negative influence on

|        |       |       |       |       |
|--------|-------|-------|-------|-------|
| health | 0.017 | 0.005 | 0.001 | 0.016 |
|--------|-------|-------|-------|-------|

---

483 <sup>a</sup> Adjusted for potential confounders, sex, age, marital status, and years of education via linear

484 regression as described in the methods.

485 <sup>b</sup> FDR is false discovery rate, controlling for multiple testing.

486

487 **FIGURE LEGENDS**

488  
489 **Fig. 1. Overview of data collection, analysis, and interventions.** This flow-chart  
490 shows the social network data acquisition, identification of modifiable elements in the  
491 social environment, and potential intervention strategies.

492  
493 **Fig 2: Structure of participants' personal social network.** Each small network  
494 has a black circle that represents the participant, who is surrounded by white circles  
495 who are the network members. The lines connecting the circles are red if the  
496 relationship is strong and blue if the relationship is weak. Networks are arranged from  
497 the smallest (top left) to the largest (bottom right).

498  
499 **Fig 3: Health habits in participants' personal social network.** In each network,  
500 a black circle is the participant, a white circle is a healthy social contact, and a red dot is  
501 an unhealthy social contact. Unhealthiness is defined as someone who does any of the  
502 following: smokes, does not exercise, does not visit doctors regularly, or not compliant  
503 with prescription medications. Networks are arranged from least negative health  
504 influence (top left) to most negative health influence (bottom right).

505  
506 **Fig 4: Comparison of expected versus observed regression results.** Quantile-  
507 quantile plot of expected versus observed P values of composite network structure and  
508 network composition metrics in relation to neurological function and disability in the  
509 full cohort (A, B) and subgroups of asymptomatic (C, D) and MS participants (E, F). The  
510 expected P values ( $-\log_{10}[P \text{ value}]$ ) are shown on the x-axis, and the observed P values  
511 ( $-\log_{10}[P \text{ value}]$ ) are shown on the y-axis. The dark gray area indicate the confidence

512 interval ranges as generated by chance at a threshold of  $P= 0.10$ , and the light grey is for  
513  $P= 0.05$ . The observed values for composition, and not structure, are outside of the grey  
514 areas, suggesting that composition is associated with the MSRS-R score beyond chance  
515 after accounting for multiple testing burden and correlation structure of the  
516 composition variables.

517

518
